# Supplementary material for: Scientific Wealth in Middle East and North Africa: Productivity, Indigeneity, and Specialty in 1981–2013
Source: PLOS journal article supplement (doi:10.1371/journal.pone.0164500), 2016-11-07
Supplement: S1 (10.1371/journal.pone.0164500.s001) [file journal.pone.0164500.s001]

## **File S1: Supplementary Materials**

### **Scientific Wealth in Middle East and North Africa: Productivity, Indigeneity, and Specialty in 1981 – 2013**

**Authors:** Afreen Siddiqi<sup>1,2\*</sup>, Jonathan Stoppani<sup>3</sup>, Laura Diaz Anadon<sup>1,4</sup>, Venkatesh Narayanamurti<sup>1,5</sup>

#### **Affiliations:**

<sup>1</sup> Belfer Center for Science and International Affairs, John F. Kennedy School of Government, Harvard University, Cambridge, MA, USA.

<sup>2</sup> Institute for Data, Systems, and Society, Massachusetts Institute of Technology, Cambridge, MA, USA.

<sup>3</sup> Haute école spécialisée de Suisse occidentale, Boulevard de Perolles 80, 1700 Fribourg, Switzerland.

<sup>4</sup> Department of Politics and International Studies, University of Cambridge, Cambridge, UK.

<sup>5</sup> School of Engineering and Applied Sciences, Harvard University, Cambridge, MA, USA

#### **\*Corresponding Author:**

Afreen Siddiqi, Harvard Kennedy School, 124 Mt. Auburn St., Cambridge, MA 02138. Email: [afreen\\_siddiqi@hks.harvard.edu](mailto:afreen_siddiqi@hks.harvard.edu)

#### **Keywords:**

Middle East science | scientific productivity | bibliometrics | indigeneity | specialty | scientific capacity | knowledge economy | international collaborations | scientific advantage | catch-up| absorptive capacity| national innovation system

## Section A: Methods and Data

We used the peer-reviewed published journal paper as the basic unit of scientific output, and conducted our analysis of scientific activity in the MENA countries on data sourced from the Science Citation Index - Expanded<sup>TM</sup> accessed by Web of Science<sup>TM</sup> Core Collection that includes over 8500 leading scientific and technical journals. The outputs of scientific activities are much more than published papers, bibliometric analysis nevertheless allows for comparisons and quantitative measurements of the system that are traceable over time. Measuring the quantity of research output is an important part of informed policy making, and is employed by government agencies tasked with assessing national scientific activities (20). Citations and impact factors can also provide important insights. However, we focus on quantity of output since our focus of study is countries seeking to develop nascent scientific research activities for which publication volume would be a more useful assessment measure.

We analyzed seventeen countries: Morocco, Libya, Algeria, Tunisia, Sudan, Egypt, Jordan, Lebanon, Syria, Iraq, Yemen, Saudi Arabia, Oman, United Arab Emirates, Bahrain, Kuwait, and Qatar. Arabic is the dominant language in all of these countries, but scientific and technical research is primarily published in English (~98-99%). The known English language publication bias (23) will therefore not distort significantly the productivity comparison among the MENA countries, although it will affect the cases of China and some other countries that are provided as context for the MENA data.

***Data collection and analysis.*** Publications data for this study was obtained from the Science Citation Index-Expanded using advanced search queries executed in the online search engine on the Web of Science<sup>TM</sup> Core Collection. We included full journal articles only (and did not account for letters, reviews, conference papers, books or other publications). The queries were performed during 2014 through 2015. Due to the consistent growth of journals indexed in the database, it is likely that there may be some differences in exact publication counts for queries executed at a later time. The focus of our work was on analyzing total scientific publications in nations that have not had significant research activities in the recent past. Therefore, we chose the Science Citation Index-Expanded (rather than the more widely used Science Citation Index) since it has wider coverage (although of varying journal quality).

The yearly population data was obtained from the Data Bank web portal of the World Bank (24) that was used for computing per capita annual publications for each country. Population data used for 2013 is shown in Table B.

### *Publications Data*

We obtained publications volume data for each country using advanced search queries of the form: “CU=<country name>” with publication type specified as ‘journal article’ and ‘English’ language. The advanced search field tag, ‘CU’, searches for countries in addresses fields within records (25). The results of each country’s search were counted by year using the Web Of Science analysis tool.

### *Author Location Data*

For author location data, we obtained the full citation records of all publications between 1981-2013 for Kuwait, Qatar, UAE, Saudi Arabia, Bahrain, Oman, Yemen, Sudan, Libya, Syria, and

Iraq. For other countries (with larger number of publications), we obtained random samples of 500 records for each year and analyzed address information of reprint authors in that sample (using our text parsing routines coded in Matlab<sup>TM</sup>) to statistically estimate indigeneity.

### Subject Area Data

We obtained subject area data for each country by analyzing the country results in multi- year intervals (1981-85, 1986-90, 1991-95, 1996-2000, 2001-2005, 2006-2010, and 2011-2013) with ‘research area’ analysis in Web of Science. This provides count of papers for each area. It should be noted that a paper may be assigned multiple subject areas (e.g. it may have two areas Ecology, and Marine & Freshwater Biology) associated with it. We found the world total annual publications in each area by running advanced search queries of the form: “WC=<subject area name>”, and then sorted the results by year. We conducted this search for 175 areas (Table A) that we determined to be relevant leaving out areas from social sciences (such as economics, business management *etc.*)

The subject areas were consolidated into 15 categories (Table A) to allow for simpler presentation of results and high-level insights. The categories were based on results reported in (21), wherein a systematic decomposition of a journal-journal citation matrix was used to identify inter-connected disciplines. We used those results with some modifications for engineering disciplines that are relevant for the regional economies in the MENA.

**Table A: Classification of Web of Science Subject Categories**

| Discipline Category              | Subject Areas listed in Web of Science                                                                                                                                                                                                                                                                                                                                                                                                                                                                                                                                                                                           |
|----------------------------------|----------------------------------------------------------------------------------------------------------------------------------------------------------------------------------------------------------------------------------------------------------------------------------------------------------------------------------------------------------------------------------------------------------------------------------------------------------------------------------------------------------------------------------------------------------------------------------------------------------------------------------|
| Agriculture                      | AGRICULTURAL ECONOMICS POLICY, AGRICULTURE DAIRY ANIMAL SCIENCE, AGRICULTURE MULTIDISCIPLINARY, AGRONOMY, FOOD SCIENCE TECHNOLOGY, HORTICULTURE, MATERIALS SCIENCE PAPER WOOD, PLANT SCIENCES                                                                                                                                                                                                                                                                                                                                                                                                                                    |
| Biomedical Sciences              | ANATOMY MORPHOLOGY, ANDROLOGY, BIOCHEMICAL RESEARCH METHODS, BIOCHEMISTRY MOLECULAR BIOLOGY, BIOLOGY, BIOPHYSICS, BIOTECHNOLOGY APPLIED MICROBIOLOGY, CELL BIOLOGY, CELL TISSUE ENGINEERING, DEVELOPMENTAL BIOLOGY, ENDOCRINOLOGY METABOLISM, ENGINEERING BIOMEDICAL, GENETICS HEREDITY, INTEGRATIVE COMPLEMENTARY MEDICINE, MATHEMATICAL COMPUTATIONAL BIOLOGY, MEDICAL LABORATORY TECHNOLOGY, MEDICINE RESEARCH EXPERIMENTAL, MICROSCOPY, MULTIDISCIPLINARY SCIENCES, NUTRITION DIETETICS, OBSTETRICS GYNECOLOGY, ONCOLOGY, PATHOLOGY, PHARMACOLOGY PHARMACY, PHYSIOLOGY, REPRODUCTIVE BIOLOGY, TOXICOLOGY, UROLOGY NEPHROLOGY |
| Chemistry / Chemical Engineering | CHEMISTRY ANALYTICAL, CHEMISTRY APPLIED, CHEMISTRY INORGANIC NUCLEAR, CHEMISTRY MEDICINAL, CHEMISTRY MULTIDISCIPLINARY, CHEMISTRY ORGANIC, CHEMISTRY PHYSICAL, CRYSTALLOGRAPHY, ELECTROCHEMISTRY, ENGINEERING CHEMICAL, POLYMER SCIENCE                                                                                                                                                                                                                                                                                                                                                                                          |

|                                             |                                                                                                                                                                                                                                                                                                                                                                                                   |
|---------------------------------------------|---------------------------------------------------------------------------------------------------------------------------------------------------------------------------------------------------------------------------------------------------------------------------------------------------------------------------------------------------------------------------------------------------|
| Clinical Medicine                           | ANESTHESIOLOGY, CARDIAC CARDIOVASCULAR SYSTEMS, CRITICAL CARE MEDICINE, DENTISTRY ORAL SURGERY MEDICINE, DERMATOLOGY, EMERGENCY MEDICINE, GASTROENTEROLOGY HEPATOLOGY, GERONTOLOGY, HEMATOLOGY, ORTHOPEDICS, OTORHINOLARYNGOLOGY, PEDIATRICS, PERIPHERAL VASCULAR DISEASE, RADIOLOGY NUCLEAR MEDICINE MEDICAL IMAGING, RESPIRATORY SYSTEM, RHEUMATOLOGY, SPORT SCIENCES, SURGERY, TRANSPLANTATION |
| Computer Science/<br>Electrical Engineering | AUTOMATION CONTROL SYSTEMS, COMPUTER SCIENCE ARTIFICIAL INTELLIGENCE, COMPUTER SCIENCE CYBERNETICS, COMPUTER SCIENCE HARDWARE ARCHITECTURE, COMPUTER SCIENCE INFORMATION SYSTEMS, COMPUTER SCIENCE INTERDISCIPLINARY APPLICATIONS, COMPUTER SCIENCE SOFTWARE ENGINEERING, COMPUTER SCIENCE THEORY METHODS, ENGINEERING ELECTRICAL ELECTRONIC, INSTRUMENTS INSTRUMENTATION, TELECOMMUNICATIONS     |
| Ecology                                     | BIODIVERSITY CONSERVATION, ECOLOGY, ENTOMOLOGY, EVOLUTIONARY BIOLOGY, FISHERIES, MARINE FRESHWATER BIOLOGY, ORNITHOLOGY, ZOOLOGY                                                                                                                                                                                                                                                                  |
| Environmental Science<br>/Civil Engineering | AGRICULTURAL ENGINEERING, CONSTRUCTION BUILDING TECHNOLOGY, ENGINEERING CIVIL, ENGINEERING ENVIRONMENTAL, ENGINEERING GEOLOGICAL, ENGINEERING OCEAN, ENVIRONMENTAL SCIENCES, ENVIRONMENTAL STUDIES, TRANSPORTATION, TRANSPORTATION SCIENCE TECHNOLOGY, WATER RESOURCES                                                                                                                            |
| General Medicine/<br>Health                 | AUDIOLOGY SPEECH LANGUAGE PATHOLOGY, HEALTH CARE SCIENCES SERVICES, MEDICAL ETHICS, MEDICAL INFORMATICS, MEDICINE GENERAL INTERNAL, NURSING, PRIMARY HEALTH CARE, PUBLIC ENVIRONMENTAL OCCUPATIONAL HEALTH                                                                                                                                                                                        |
| Geosciences/<br>Petroleum Engineering       | ENERGY FUELS, ENGINEERING PETROLEUM, GEOCHEMISTRY GEOPHYSICS, GEOGRAPHY PHYSICAL GEOLOGY, GEOSCIENCES MULTIDISCIPLINARY, IMAGING SCIENCE PHOTOGRAPHIC TECHNOLOGY, LIMNOLOGY, METEOROLOGY ATMOSPHERIC SCIENCES, MINERALOGY, MINING MINEARL PROCESSING, OCEANOGRAPHY, PALEONTOLOGY, REMOTE SENSING, SOIL SCIENCE                                                                                    |
| Infectious Diseases                         | ALLERGY, IMMUNOLOGY, INFECTIOUS DISEASES, MICROBIOLOGY, MYCOLOGY, PARASITOLOGY, TROPICAL MEDICINE, VETERINARY SCIENCES, VIROLOGY                                                                                                                                                                                                                                                                  |
| Materials science                           | MATERIALS SCIENCE BIOMATERIALS, MATERIALS SCIENCE CERAMICS, MATERIALS SCIENCE CHARACTERIZATION TESTING, MATERIALS SCIENCE COATINGS FILMS, MATERIALS SCIENCE MULTIDISCIPLINARY, MATERIALS SCIENCE TEXTILES, METALLURGY METALLURGICAL ENGINEERING, NANOSCIENCE NANOTECHNOLOGY, PHYSICS APPLIED                                                                                                      |
| Mathematics                                 | LOGIC, MATHEMATICS, MATHEMATICS APPLIED, MATHEMATICS INTERDISCIPLINARY APPLICATIONS, STATISTICS PROBABILITY                                                                                                                                                                                                                                                                                       |

|                                                  |                                                                                                                                                                                                                                                            |
|--------------------------------------------------|------------------------------------------------------------------------------------------------------------------------------------------------------------------------------------------------------------------------------------------------------------|
| Mechanical, Industrial, Aeronautical Engineering | ACOUSTICS, ENGINEERING AEROSPACE, ENGINEERING INDUSTRIAL, ENGINEERING MANUFACTURING, ENGINEERING MARINE, ENGINEERING MECHANICAL, ENGINEERING MULTIDISCIPLINARY, MATERIALS SCIENCE COMPOSITES, MECHANICS, ROBOTICS, THERMODYNAMICS                          |
| Neurosciences                                    | BEHAVIORAL SCIENCES, CLINICAL NEUROLOGY, GERIATRICS GERONTOLOGY, NEUROIMAGING, NEUROSCIENCES, OPHTHALMOLOGY, PSYCHIATRY, PSYCHOLOGY, REHABILITATION, SUBSTANCE ABUSE                                                                                       |
| Physics/Nuclear Sciences                         | ASTRONOMY ASTROPHYSICS, NUCLEAR SCIENCE TECHNOLOGY, OPTICS, PHYSICS ATOMIC MOLECULAR CHEMICAL, PHYSICS CONDENSED MATTER, PHYSICS FLUIDS, PLASMAS, PHYSICS MATHEMATICAL, PHYSICS MULTIDISCIPLINARY, PHYSICS NUCLEAR, PHYSICS PARTICLES FIELDS, SPECTROSCOPY |

**Field-Visits and Interviews.** We conducted semi-structured interviews with students, faculty, senior university administrators (including presidents and college deans), technology company executives, and education policy makers in Saudi Arabia, Qatar, Kuwait, and UAE during 2013-2014. In addition, we also made visits to a number of institutions in Morocco, Jordan, Turkey, and Lebanon during 2013-2015. Some of the institutions we visited included: King Abdullah University of Science and Technology (Saudi Arabia), King Fahd University of Petroleum and Minerals (Saudi Arabia), Dhahran Techno Valley (Saudi Arabia), King Abdullah Economic City (Saudi Arabia), Saudi Oil Company (Saudi Arabia), Qatar University, Texas A&M University – Doha (Qatar), Qatar Foundation, Kuwait University, Kuwait Institute for Scientific Research, Kuwait Foundation for Advancement of Science, Advanced Technology Company (Kuwait), Gulf University of Science and Technology (Kuwait), Masdar Institute for Science and Technology (UAE), Abu Dhabi Technology Investment Company (UAE), UAE University- Al Ain, Khalifa University (UAE). The on-site interviews and discussions informed the analysis we present here. Some of the key issues that were highlighted included shifting (rather than sustained) state support and funding for science, inadequate students' preparation in science and math in early and high-school education, negative impacts of socio-political turmoil, and emphasis on international collaborations.

## ***Definitions and Equations***

### **1. Publications Volume**

The total publications for a country  $i$  in year  $t$  was defined as:

$$X_i(t) = \text{\# of publications with atleast one author address in country } i \quad (1)$$

The whole-counting approach was used, where for instance, if a publication had three co-authors, and one of the co-authors had an address in Kuwait, the publication would be included as a full count for Kuwait. This approach provided an upper limit accounting of the publications for each

country. The attribution for each country was made only the basis of address information and the citizenship or national origin of authors was not taken into account.

The global share of each country was computed for each year  $t$  as:

$$\text{Share of country } i \text{ in world publications (t)} = \frac{X_i(t)}{\sum_{i=1}^N X_i(t)} \quad (2)$$

where  $N$  is the number of countries with journal publications records in year  $t$ .

## 2. Scientific Productivity

The productivity was measured as the ratio of annual publications and population for each country. We computed the scientific productivity,  $\eta_i$  of country  $i$  in year  $t$ , as:

$$\eta_i(t) = \frac{X_i(t)}{P_i(t)} \quad (3)$$

where  $P_i(t)$  is population of country  $i$  in year  $t$ .

This ratio (of total publications to total population) has been used in past work (1,2). Ideally, the number of total scientists and researchers should be used instead of total population of a country. The productivity measures computed for US and OECD countries typically use data of scientific research workforce. This data however is not available for many countries where science and technology sectors are not well developed. In such cases, the total population serves as a proxy variable for determining productivity.

The productivity values computed with total population numbers have to be treated with caution, since the demographics in MENA countries are heavily skewed towards younger ages. The 0-14 years age group constitutes 28% of the population on average in the region (Table B). In the selected countries used for comparison, the 0-14 years age group constitutes 19% of the population on average (Table B).

## 3. Scientific Indigeneity

In this measure we are interested in assessing the extent of the scientific output that can be attributed to researchers resident in a country. Co-location of researchers is an important issue, since it impacts the speed and type of knowledge transfer, and efficiency and quality of collaborations driven by shared research interests. Furthermore, in some cases it has been found that geographic proximity is important for university-firm interactions (14) – and this can have important implications for workforce training, as well as innovation, and industrial competitiveness. The impact of geography on knowledge transfer is an active area of research given the new globalizing trends, increased mobility and ease of communications.

We use the country addresses of corresponding authors to account for scientific output for each country. The corresponding author is often fully knowledgeable about the work that is presented in the paper and manages the paper through the peer-review process. She may be the researcher

who has done the primary work, or is the senior researcher who has been a central part of the work. Our choice of corresponding author allows for striking a balance in the issue of first and last author contributions, where in some fields, the first author represents the researcher who has done the primary work, whereas in some cases the last author is the main driver of the research. We compute the indigeneity,  $\lambda_i$  of country  $i$ 's scientific publications, as

$$\lambda_i(t) = \frac{x_i(t)}{X_i(t)} \quad (4)$$

where  $x_i$  is the number of publications in year  $t$  where the corresponding author has address in country  $i$ .

We recognize that there are limitations with this approach. The contact addresses of the corresponding author may not accurately reflect the location where the published work was actually conducted. Furthermore, researchers frequently move, or often have multiple concurrent affiliations with institutions located in different countries. Nonetheless, the author country addresses provide a verifiable and quantifiable measure for assessing general patterns of location of scientific activities and collaborations, and we utilize this information to conduct our analysis. There is also no reason to believe that this introduces significant biases in the cross-country comparison.

#### 4. Scientific Specialization – Revealed Scientific Advantage (RSA)

We analyzed subject areas of publications for each country and compared share of publications in particular subject areas of a country in total world publications. Using the Revealed Comparative Advantage (RCA) concept from international trade theory (26), we defined the Revealed Scientific Advantage ( $\rho_{ij}$ ) for a country  $i$  in subject  $j$  as:

$$\rho_{ij}(t) = \frac{\frac{x_{ij}(t)}{X_i(t)}}{\frac{x_{Worldj}(t)}{X_{World}(t)}} \quad (5)$$

The Revealed Scientific Advantage (RSA) is the RCA of a country's publications. It is computed as the fraction of publications in subject  $j$  within country  $i$ 's total publications normalized by the fraction of publications in subject  $j$  in total world publications. RSA gives a measure of how the publications output in a subject differs from the world average. Past research has focused on relative citation impact and publications RCA of countries within different fields of science (1). It was found that scientifically strong countries (such as the US and Japan) and scientifically weak countries (such as Papua New Guinea) had no particular pattern of specialization. To the best of the knowledge of the authors, there has been no recent assessments of field specific specializations for MENA region or an updated analysis for the comparison group.

## **Section B: Recent developments in Science and Technology in MENA**

Over the last several decades, Arab countries in the Middle East and North Africa (MENA) region have lagged behind in scientific research (5) with insufficient government support and lack of long-term focus on building local capacity in science and technology. However, in recent years the oil-dependent economies of Saudi Arabia, United Arab Emirates, and Qatar in particular have sought to expand their scientific and technological capacity for economic diversification (27, 28). In 2011, Saudi Arabia was among the top 40 countries in the world for R&D spending (29), and in 2014, 56 billion US dollars representing 24% of the total Saudi national budget was allocated for education and training (30). The United Arab Emirates (UAE) has established new universities (such as the Masdar Institute of Science and Technology) and campuses (including NYU-Abu Dhabi, INSEAD-Abu Dhabi and several others), and has sought to become a research hub of renewable energy technologies. The Qatari government established Education City in Doha that includes branch campuses of US engineering and medical schools and established the Qatar National Research Foundation to initiate and build a local research enterprise. Additionally, Egypt launched major efforts to revitalize national science and technology. The Higher Education Reform Strategy (2002 –2017) was introduced to improve the quality of education, the Decade for Science and Technology 2007-16 was announced in 2006, a National Strategic Plan for Pre-University Education Reform was introduced in 2007, several new research funding and training programs and collaborations with other countries (including Japan, Germany) were formally established (34).

Many regional universities – that had historically only focused on teaching and professional training – are embracing research as a key part of their core mission. This adoption of the Humboldtian model in the region, wherein universities are not only repositories of knowledge, but contribute to creating new knowledge (27, 31), is evident through expansion of research faculty in science and engineering departments, creation of new and expanded laboratories, and established of science and technology parks in the region. Middle Eastern universities are actively targeting foreign researchers to relocate to the region to jumpstart and expand local research (32). These efforts – from increased funding to attracting scientific research talent – are bearing some results as publications in MENA countries have been on the upward trajectory (Fig. A).



**Journal publications (in English) in Web of Science with authors in Arab countries**

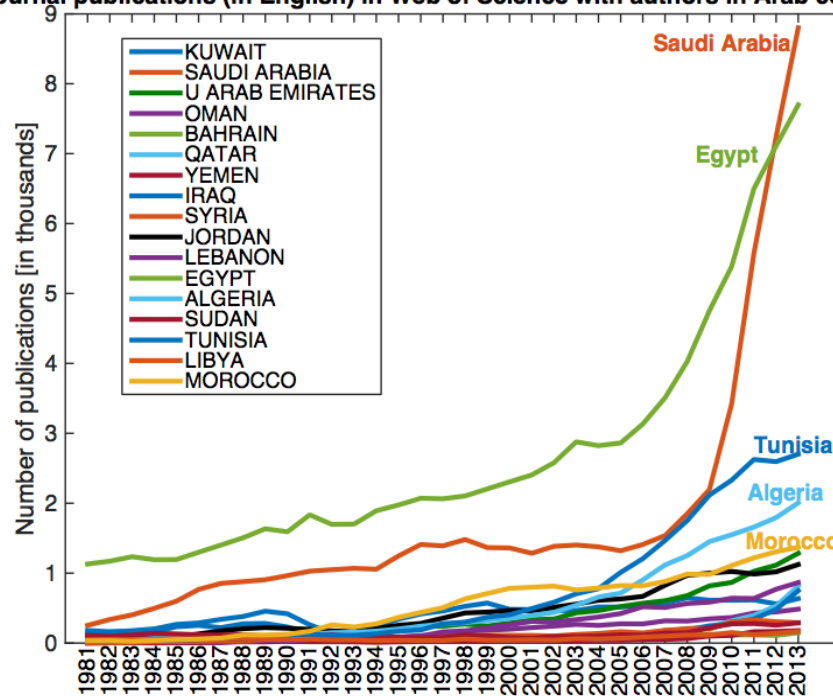

**Fig. A:** Annual publications in scientific journals with authors from 17 MENA countries. Egypt was the historical leader in total output in the region, but has been surpassed by Saudi Arabia.

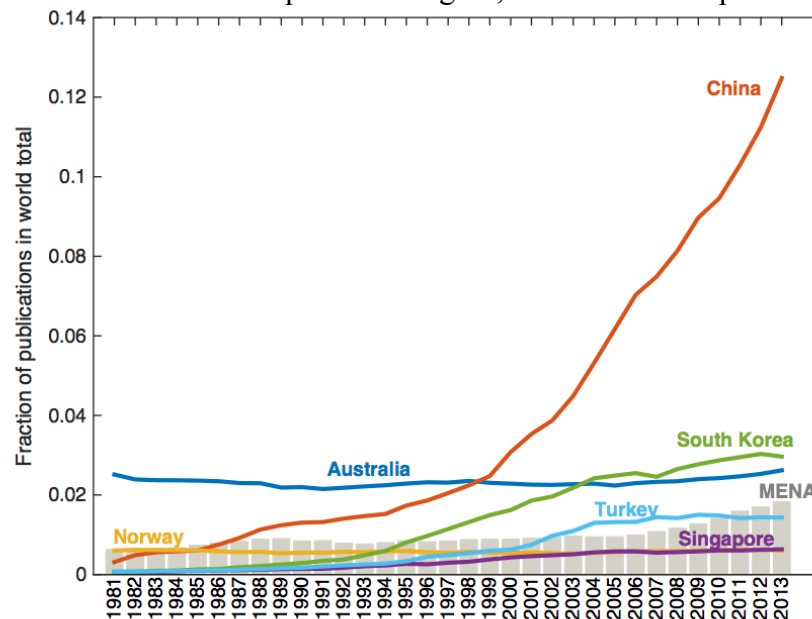

**Fig. B:** Share of countries in comparison group. China's share has risen from 0.3% in 1981 to 12.5% in 2013. South Korea, Turkey, and Singapore have gained share. Share for US (not shown) decreases from 40.6% in 1981 to 19.2% in 2013.

The top five MENA countries in 2013 were Saudi Arabia, Egypt, Tunisia, Algeria and Morocco in terms of share of global journal publications with 0.54%, 0.48%, 0.16%, 0.12%, and 0.08% respectively. The shares for the comparison group of seven countries in 2013 were: Norway 0.6%, Singapore 0.63%, Turkey 1.43%, Australia 2.61% and South Korea 2.96%, China 12.48% and US 19.2%. It can be noted that the largest MENA countries (Egypt and Saudi Arabia in

terms of publications share) had smaller shares than the smallest countries in the comparison group (Singapore and Norway).

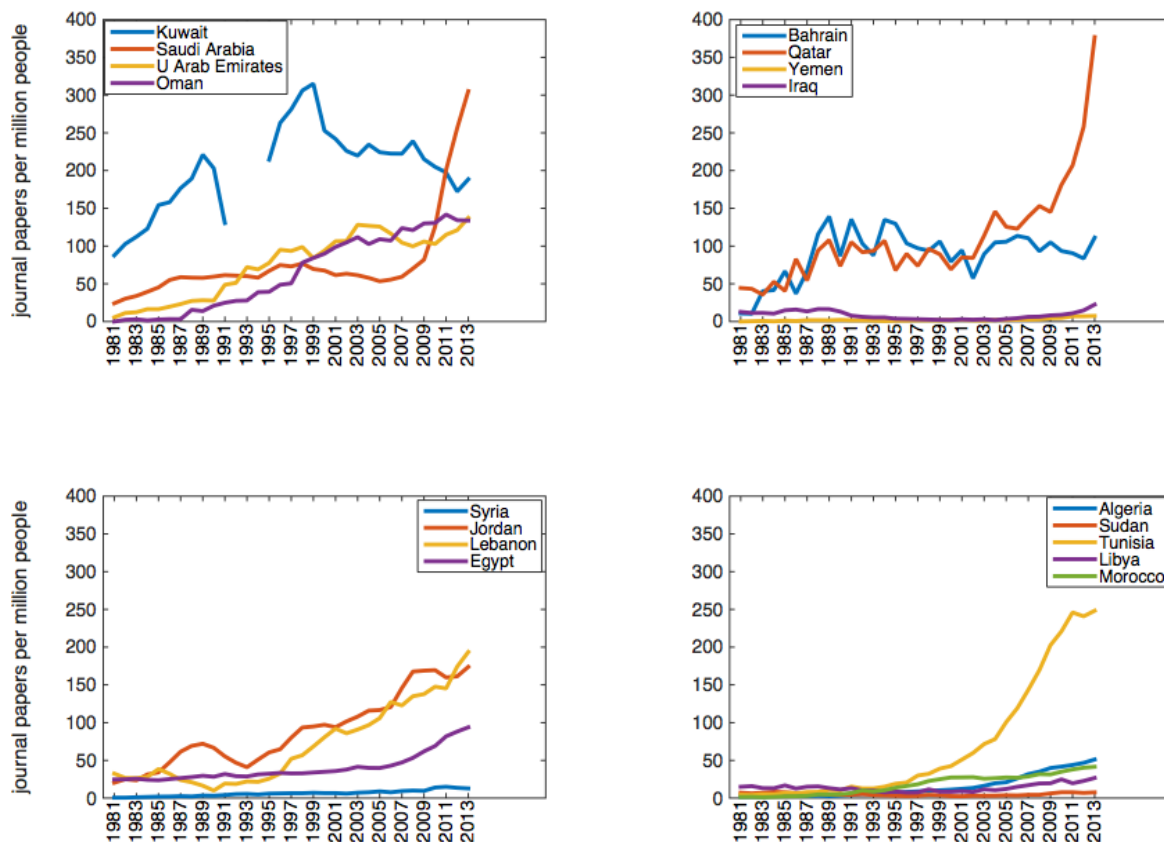

**Fig. C:** Journal publications per million people in MENA countries between 1981-2013. Data is missing for Kuwait for 1990-91 due to lack of population data for those years.

**Table B:** Population Data for MENA and comparator group (33)

| Middle East and North Africa | Total Population (estimated for 2013) | Average annual population growth [%] (2000-13) | Population composition of ages 0-14 years [%] |
|------------------------------|---------------------------------------|------------------------------------------------|-----------------------------------------------|
| Algeria                      | 39,208,194                            | 2                                              | 28                                            |
| Bahrain                      | 1,332,171                             | 5                                              | 21                                            |
| Egypt                        | 82,056,378                            | 2                                              | 31                                            |
| Iraq                         | 33,417,476                            | 3                                              | 40                                            |
| Jordan                       | 6,459,000                             | 2                                              | 34                                            |
| Kuwait                       | 3,368,572                             | 4                                              | 25                                            |
| Lebanon                      | 4,467,390                             | 2                                              | 21                                            |
| Libya                        | 6,201,521                             | 1                                              | 29                                            |
| Morocco                      | 33,008,150                            | 1                                              | 28                                            |

|                         |               |      |       |
|-------------------------|---------------|------|-------|
| Oman                    | 3,632,444     | 4    | 23    |
| Qatar                   | 2,168,673     | 10   | 14    |
| Saudi Arabia            | 28,828,870    | 3    | 29    |
| Sudan                   | 37,964,306    | 2    | 41    |
| Syria                   | 22,845,550    | 3    | 35    |
| Tunisia                 | 10,886,500    | 1    | 23    |
| United Arab Emirates    | 9,346,129     | 9    | 15    |
| Yemen                   | 24,407,381    | 3    | 40    |
|                         |               |      |       |
| MENA Total              | 349,598,381   |      |       |
| MENA Average            |               | 3.35 | 28.05 |
| <b>Comparator group</b> |               |      |       |
| Australia               | 23,130,900    | 1    | 19    |
| China                   | 1,357,380,000 | 1    | 18    |
| Korea, Rep.             | 50,219,669    | 1    | 15    |
| Norway                  | 5,084,190     | 1    | 19    |
| Singapore               | 5,399,200     | 2    | 16    |
| Turkey                  | 74,932,641    | 1    | 26    |
| United States           | 316,128,839   | 1    | 20    |
| Comparator average      |               | 1.14 | 19    |

**Table C. Annual journal publications from MENA and other selected countries.**

|         | 1981 | 1982 | 1983 | 1984 | 1985 | 1986 | 1987 | 1988 | 1989 | 1990 |
|---------|------|------|------|------|------|------|------|------|------|------|
| Algeria | 40   | 46   | 43   | 63   | 64   | 61   | 66   | 84   | 69   | 96   |
| Bahrain | 0    | 0    | 16   | 17   | 28   | 16   | 30   | 54   | 67   | 43   |
| Egypt   | 1130 | 1171 | 1234 | 1193 | 1195 | 1299 | 1401 | 1505 | 1634 | 1591 |
| Iraq    | 180  | 162  | 169  | 159  | 233  | 252  | 220  | 275  | 280  | 230  |
| Jordan  | 46   | 59   | 58   | 80   | 90   | 130  | 175  | 204  | 220  | 211  |
| Kuwait  | 126  | 155  | 177  | 203  | 267  | 289  | 339  | 380  | 455  | 418  |
| Lebanon | 85   | 70   | 70   | 75   | 103  | 86   | 64   | 56   | 44   | 27   |

|                 |        |        |        |        |        |        |        |        |        |        |
|-----------------|--------|--------|--------|--------|--------|--------|--------|--------|--------|--------|
| Libya           | 48     | 53     | 46     | 47     | 63     | 49     | 60     | 63     | 55     | 49     |
| Morocco         | 31     | 33     | 24     | 37     | 50     | 58     | 70     | 117    | 114    | 125    |
| Oman            | 0      | 0      | 0      | 0      | 0      | 0      | 0      | 26     | 24     | 38     |
| Qatar           | 11     | 12     | 11     | 18     | 15     | 33     | 23     | 42     | 50     | 35     |
| Saudi Arabia    | 252    | 338    | 402    | 496    | 599    | 766    | 853    | 878    | 906    | 964    |
| Sudan           | 107    | 96     | 114    | 139    | 131    | 118    | 114    | 120    | 99     | 89     |
| Syria           | 0      | 0      | 11     | 15     | 20     | 23     | 29     | 26     | 41     | 39     |
| Tunisia         | 29     | 28     | 36     | 35     | 50     | 49     | 61     | 65     | 86     | 82     |
| U Arab Emirates | 6      | 13     | 15     | 21     | 22     | 28     | 35     | 44     | 48     | 50     |
| Yemen           | 0      | 0      | 0      | 0      | 0      | 0      | 0      | 0      | 0      | 0      |
|                 |        |        |        |        |        |        |        |        |        |        |
| Turkey          | 251    | 257    | 291    | 360    | 384    | 440    | 522    | 609    | 745    | 835    |
| Singapore       | 149    | 178    | 224    | 311    | 392    | 433    | 467    | 520    | 618    | 687    |
| South Korea     | 219    | 263    | 345    | 384    | 517    | 574    | 781    | 951    | 1168   | 1414   |
| China           | 1047   | 1720   | 2085   | 2266   | 2427   | 3108   | 3928   | 5039   | 5787   | 6391   |
| Norway          | 2010   | 2188   | 2286   | 2368   | 2444   | 2397   | 2404   | 2540   | 2484   | 2703   |
| USA             | 136120 | 142657 | 148409 | 153261 | 155547 | 156117 | 158436 | 163279 | 169453 | 174661 |
| Australia       | 8425   | 8437   | 8836   | 9198   | 9461   | 9670   | 9830   | 10226  | 10208  | 10760  |

|         | 1991 | 1992 | 1989 | 1994 | 1995 | 1996 | 1997 | 1998 | 1999 | 2000 |
|---------|------|------|------|------|------|------|------|------|------|------|
| Algeria | 123  | 149  | 156  | 171  | 201  | 242  | 271  | 292  | 325  | 354  |
| Bahrain | 69   | 54   | 47   | 74   | 73   | 60   | 58   | 58   | 68   | 53   |
| Egypt   | 1833 | 1697 | 1701 | 1893 | 1975 | 2070 | 2065 | 2104 | 2205 | 2305 |
| Iraq    | 139  | 115  | 103  | 105  | 77   | 72   | 67   | 60   | 53   | 51   |
| Jordan  | 196  | 175  | 160  | 207  | 254  | 280  | 357  | 430  | 444  | 466  |
| Kuwait  | 261  | 143  | 159  | 239  | 340  | 417  | 460  | 527  | 573  | 482  |
| Lebanon | 53   | 53   | 64   | 64   | 78   | 100  | 161  | 177  | 216  | 261  |
| Libya   | 57   | 45   | 45   | 36   | 41   | 36   | 37   | 58   | 43   | 43   |
| Morocco | 170  | 260  | 229  | 276  | 368  | 439  | 507  | 633  | 709  | 783  |
| Oman    | 47   | 54   | 57   | 82   | 85   | 106  | 110  | 169  | 183  | 197  |

|                 |        |        |        |        |        |        |        |        |        |        |
|-----------------|--------|--------|--------|--------|--------|--------|--------|--------|--------|--------|
| Qatar           | 51     | 45     | 46     | 53     | 34     | 46     | 39     | 53     | 51     | 41     |
| Saudi Arabia    | 1028   | 1049   | 1068   | 1056   | 1246   | 1409   | 1391   | 1480   | 1366   | 1361   |
| Sudan           | 94     | 116    | 93     | 87     | 79     | 71     | 81     | 114    | 102    | 77     |
| Syria           | 52     | 69     | 76     | 66     | 86     | 92     | 99     | 100    | 113    | 109    |
| Tunisia         | 127    | 109    | 111    | 133    | 170    | 187    | 276    | 300    | 369    | 405    |
| U Arab Emirates | 93     | 103    | 153    | 154    | 182    | 235    | 244    | 272    | 243    | 284    |
| Yemen           | 0      | 6      | 18     | 10     | 18     | 21     | 28     | 28     | 27     | 35     |
|                 |        |        |        |        |        |        |        |        |        |        |
| Turkey          | 1047   | 1256   | 1416   | 1623   | 2106   | 3188   | 3606   | 4207   | 4815   | 5146   |
| Singapore       | 747    | 920    | 1159   | 1350   | 1678   | 1847   | 2218   | 2515   | 3049   | 3546   |
| South Korea     | 1788   | 2050   | 2718   | 3513   | 5082   | 6944   | 8510   | 10291  | 11997  | 13402  |
| China           | 6849   | 7637   | 8244   | 8998   | 10890  | 13341  | 15238  | 17499  | 19900  | 25429  |
| Norway          | 2850   | 3108   | 3157   | 3423   | 3717   | 4009   | 4079   | 4446   | 4429   | 4438   |
| USA             | 183159 | 184302 | 186195 | 189581 | 194345 | 213700 | 213324 | 218434 | 218187 | 221080 |
| Australia       | 11173  | 11849  | 12428  | 13252  | 14363  | 16617  | 17197  | 18371  | 18530  | 18870  |

|         | <b>2001</b> | <b>2002</b> | <b>2003</b> | <b>2004</b> | <b>2005</b> | <b>2006</b> | <b>2007</b> | <b>2008</b> | <b>2009</b> | <b>2010</b> |
|---------|-------------|-------------|-------------|-------------|-------------|-------------|-------------|-------------|-------------|-------------|
| Algeria | 394         | 439         | 540         | 664         | 714         | 902         | 1117        | 1250        | 1450        | 1550        |
| Bahrain | 66          | 42          | 69          | 86          | 93          | 108         | 114         | 104         | 125         | 117         |
| Egypt   | 2404        | 2580        | 2878        | 2824        | 2862        | 3134        | 3508        | 4028        | 4754        | 5390        |
| Iraq    | 72          | 62          | 78          | 51          | 90          | 123         | 178         | 189         | 247         | 273         |
| Jordan  | 462         | 512         | 557         | 613         | 631         | 668         | 826         | 970         | 999         | 1025        |
| Kuwait  | 479         | 463         | 465         | 515         | 515         | 538         | 568         | 646         | 613         | 614         |
| Lebanon | 309         | 302         | 335         | 373         | 422         | 521         | 508         | 563         | 586         | 641         |
| Libya   | 48          | 43          | 63          | 58          | 68          | 84          | 99          | 113         | 116         | 150         |
| Morocco | 799         | 814         | 759         | 796         | 824         | 821         | 881         | 986         | 983         | 1110        |
| Oman    | 221         | 242         | 267         | 253         | 274         | 274         | 318         | 314         | 346         | 366         |
| Qatar   | 52          | 53          | 75          | 105         | 103         | 119         | 160         | 208         | 227         | 317         |

|                 |        |        |        |        |        |        |        |        |        |        |
|-----------------|--------|--------|--------|--------|--------|--------|--------|--------|--------|--------|
| Saudi Arabia    | 1285   | 1383   | 1402   | 1377   | 1319   | 1409   | 1537   | 1850   | 2197   | 3424   |
| Sudan           | 70     | 93     | 95     | 100    | 118    | 113    | 142    | 146    | 218    | 276    |
| Syria           | 110    | 100    | 124    | 137    | 162    | 144    | 182    | 204    | 202    | 301    |
| Tunisia         | 493    | 584    | 705    | 791    | 1010   | 1206   | 1466   | 1752   | 2116   | 2337   |
| U Arab Emirates | 333    | 344    | 432    | 464    | 522    | 568    | 606    | 678    | 818    | 868    |
| Yemen           | 42     | 31     | 29     | 42     | 41     | 49     | 53     | 63     | 101    | 109    |
|                 |        |        |        |        |        |        |        |        |        |        |
| Turkey          | 6270   | 8488   | 10076  | 12675  | 13589  | 14442  | 16435  | 17180  | 19058  | 19886  |
| Singapore       | 3883   | 4218   | 4702   | 5447   | 5987   | 6346   | 6262   | 6854   | 7366   | 8135   |
| South Korea     | 15627  | 17074  | 20099  | 23638  | 25625  | 27810  | 27991  | 32121  | 35168  | 38526  |
| China           | 29708  | 33727  | 41354  | 51993  | 63610  | 76753  | 85345  | 98571  | 113852 | 126935 |
| Norway          | 4702   | 4642   | 4840   | 5309   | 5790   | 6413   | 6719   | 7128   | 7680   | 8153   |
| USA             | 219686 | 222986 | 232442 | 241890 | 250670 | 257638 | 261224 | 268601 | 271717 | 282072 |
| Australia       | 19019  | 19611  | 20911  | 22338  | 23062  | 25061  | 26540  | 28389  | 30418  | 32540  |

|              | 2011 | 2012 | 2013 |
|--------------|------|------|------|
| Algeria      | 1660 | 1804 | 2022 |
| Bahrain      | 117  | 110  | 151  |
| Egypt        | 6501 | 7123 | 7826 |
| Iraq         | 347  | 481  | 757  |
| Jordan       | 988  | 1023 | 1128 |
| Kuwait       | 618  | 560  | 642  |
| Lebanon      | 638  | 774  | 877  |
| Libya        | 120  | 141  | 167  |
| Morocco      | 1220 | 1311 | 1378 |
| Oman         | 430  | 446  | 489  |
| Qatar        | 396  | 536  | 818  |
| Saudi Arabia | 5578 | 7249 | 8928 |
| Sudan        | 279  | 256  | 291  |
| Syria        | 329  | 309  | 292  |

|                 |        |        |        |
|-----------------|--------|--------|--------|
| Tunisia         | 2627   | 2602   | 2723   |
| U Arab Emirates | 1029   | 1120   | 1292   |
| Yemen           | 162    | 165    | 181    |
|                 |        |        |        |
| Turkey          | 20565  | 22084  | 23488  |
| Singapore       | 8764   | 9580   | 10394  |
| South Korea     | 42734  | 46618  | 48613  |
| China           | 149198 | 172829 | 204790 |
| Norway          | 8967   | 9588   | 9881   |
| USA             | 294902 | 303918 | 315082 |
| Australia       | 35778  | 38863  | 42970  |

## Section C: Publications Growth Rates in MENA Countries and Selected Comparison Countries

We computed rates of change in productivity using a 3-year moving average for 1991-2013. We only included data from 1991 onwards since science activity was small in many MENA countries in the 1980s decade. For year  $y$ , the average of the growth in  $y-2$ ,  $y-1$ , and  $y$  was computed. For 1991, we used data for 1989, 1990, and 1991. The descriptive statistics for the last two decades are shown in Fig. A.

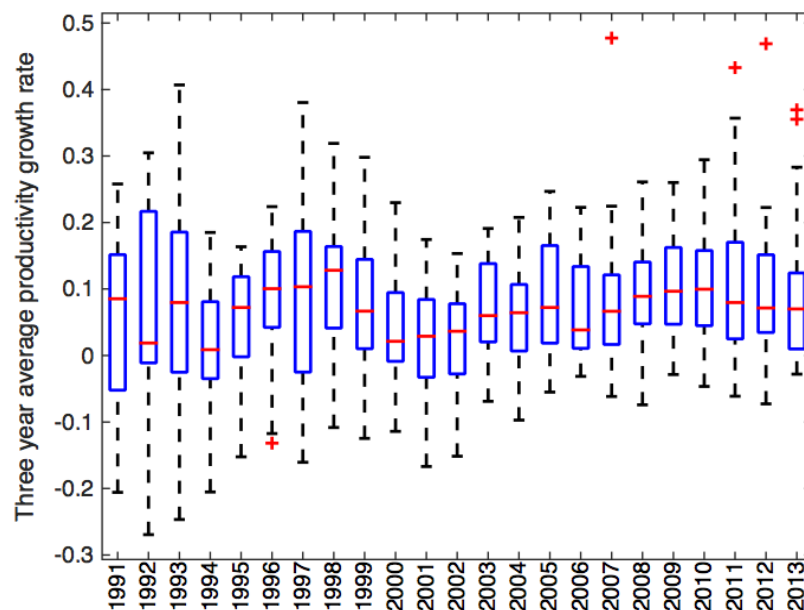

**Fig. A.** For 17 countries in MENA, median productivity growth rate has been in the range of 1.8% to 12.8% during 1991-2000, between 2.9 – 9.6% during 2001-2010, and 2011-2013 has been 7.9, 7.1, and 6.9%. The outliers in the years 2011-2013 are for Saudi Arabia and Iraq.

The results of individual countries show wide ranging variation with repeating cycles of periods of decline, stagnation, and growth for countries in the Arabian peninsula (Fig. B and C). Since 2007, Saudi Arabia and Qatar have shown sustained growth starting from approximately zero in 2007 to 35% and 28% respectively in 2013. This sustained growth led Saudi Arabia, in 2012, to surpass Egypt and Tunisia— the long time regionally scientific dominant nations - in total publications volume (see Figure A in Section B). There has been, however, debate regarding the rapid increase in publications from Saudi Arabia (35). And some experts in the discussions noted the difficulty of using publications data to assess research in the country wherein there are extensive programs for enlisting international researchers for visiting-affiliations at Saudi institutions. The countries in the Levant (Jordan, Syria, Lebanon), and North Africa also show cycles of growth and decline, with effects of socio-political turmoil and military conflict prominent for Iraq (with a negative productivity growth rate from 1991 to 2000), declining growth for Tunisia and Egypt since 2011, a sharp decline for Syria in 2012 and so on.

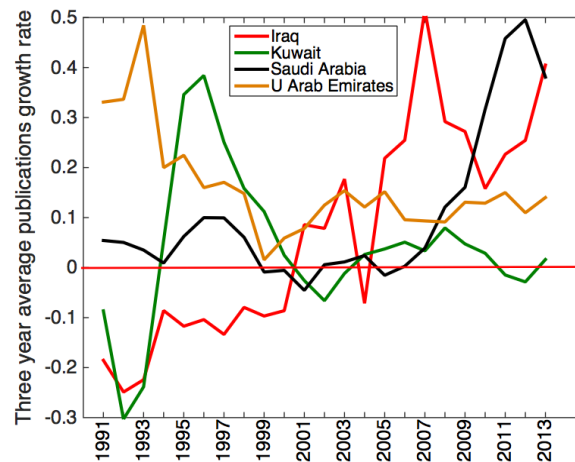

**Fig. B.** 3-year average rate of change in scientific productivity for Iraq, Kuwait, Saudi Arabia and UAE.

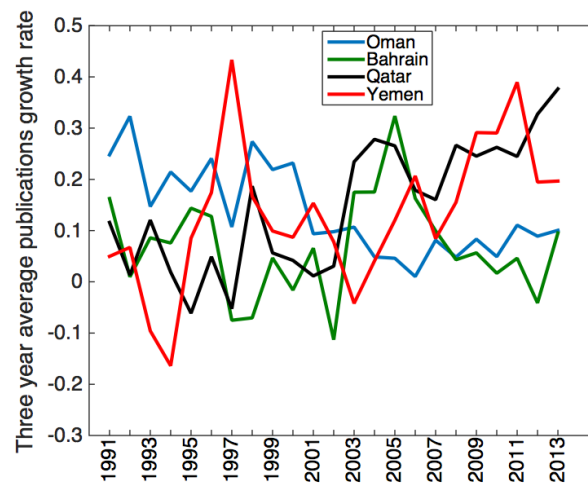

**Fig. C.** 3-year average rate of change in scientific productivity for Oman, Bahrain, Qatar, and Yemen.



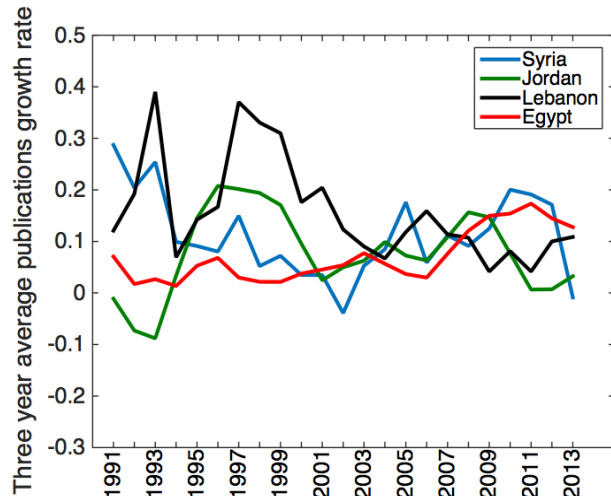

**Fig. D.** 3-year average rate of change in scientific productivity for Egypt and Levant

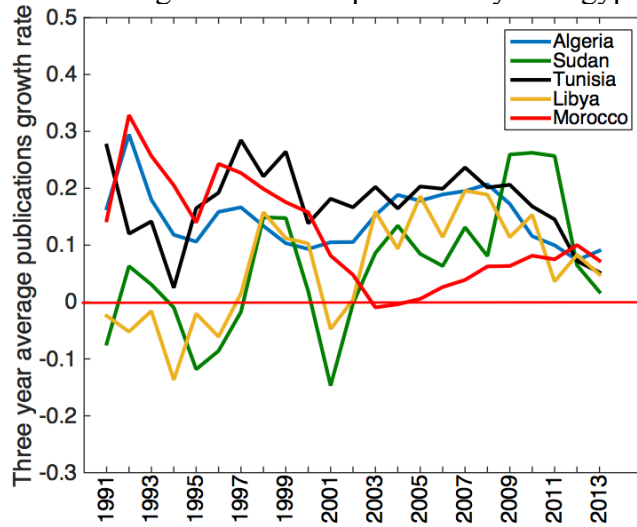

**Fig. E.** 3-year average rate of change in scientific productivity for countries in North Africa

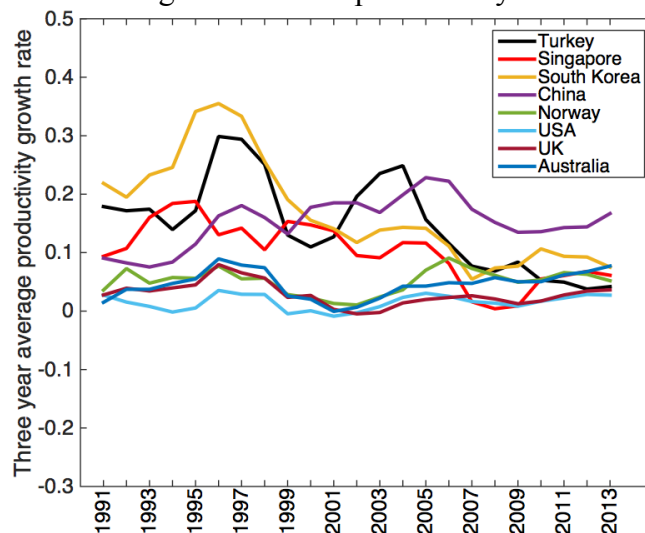

**Fig. F.** 3-year average rate of change in productivity for selected comparison countries

In comparison with selected countries, it can be noted that while there are cyclical patterns, the growth rates do not fall significantly below zero (which is the case when there is contraction of

annual publications). Figures B-E show that in every year between 1991-2013, the minimum values for the region's 3-year average growth rate has been consistently below zero. This explains why the productivity gap has widened with MENA – while the countries shown above have continued to expand scientific output (though with varying rates) year after year, several countries in MENA have repeatedly undergone a decrease in year to year per capita output leading to an erosion of any gains that may have been made in earlier years. Figures B - E show that 11 out of 17 countries had negative growth in multiple years during 1991-2013. The countries that did not experience contraction are Egypt, Tunisia, Algeria, Lebanon, UAE, and Oman.

## Section D: Scientific research indigeneity in MENA Countries

**Table D: Indigeneity Computation Error Analysis**

|              | Sample Size | Max Error Margin [%] |
|--------------|-------------|----------------------|
| Algeria      | 500         | 3.8                  |
| Bahrain      | Full        |                      |
| Egypt        | 1000        | 2.9                  |
| Iraq         | Full        |                      |
| Jordan       | 500         | 3.3                  |
| Kuwait       | Full        |                      |
| Lebanon      | 500         | 2.9                  |
| Libya        | Full        |                      |
| Morocco      | 500         | 3.5                  |
| Oman         | Full        |                      |
| Qatar        | Full        |                      |
| Saudi Arabia | Full        |                      |
| Sudan        | Full        |                      |
| Syria        | Full        |                      |
| Tunisia      | 500         | 3.96                 |
| UAE          | Full        |                      |
| Yemen        | Full        |                      |

|             |      |      |
|-------------|------|------|
|             |      |      |
| Turkey      | 1000 | 3.05 |
| Singapore   | 1000 | 2.95 |
| South Korea | 1000 | 3.07 |
| Norway      | 1000 | 4.3  |
| China       | 1000 | 3.1  |
| USA         | 1000 | 3.1  |
| Australia   | 500  | 4.4  |

The indigeneity was computed for each country for years between 2000 and 2013. A full data set was used for eleven cases (shown above), while 500 or 1000 samples were used for the rest. In cases where total publications for a particular year were less than the sample size (e.g. less than 500 or 1000), then the total number of publications was used. The margin of error in indigeneity computation for each year was equal to or less than the maximum margin of error value (at 95% confidence level) shown for each country in Table D.

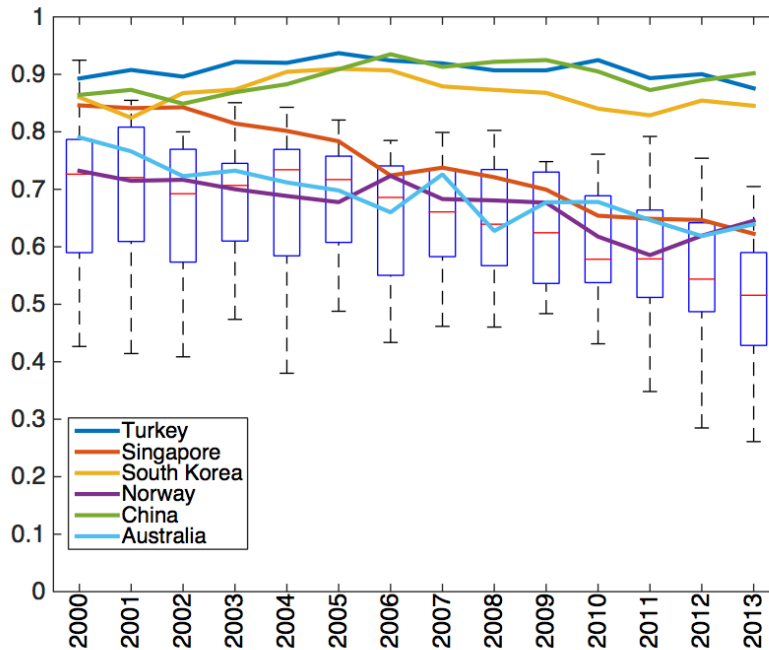

**Fig. A.** y-axis is fraction of publications with domestic corresponding authors. Box plots showing max, min, median, and inter-quartile ranges of annual indigeneity of scientific research publications from MENA countries. Selected countries from other regions are included for comparison.

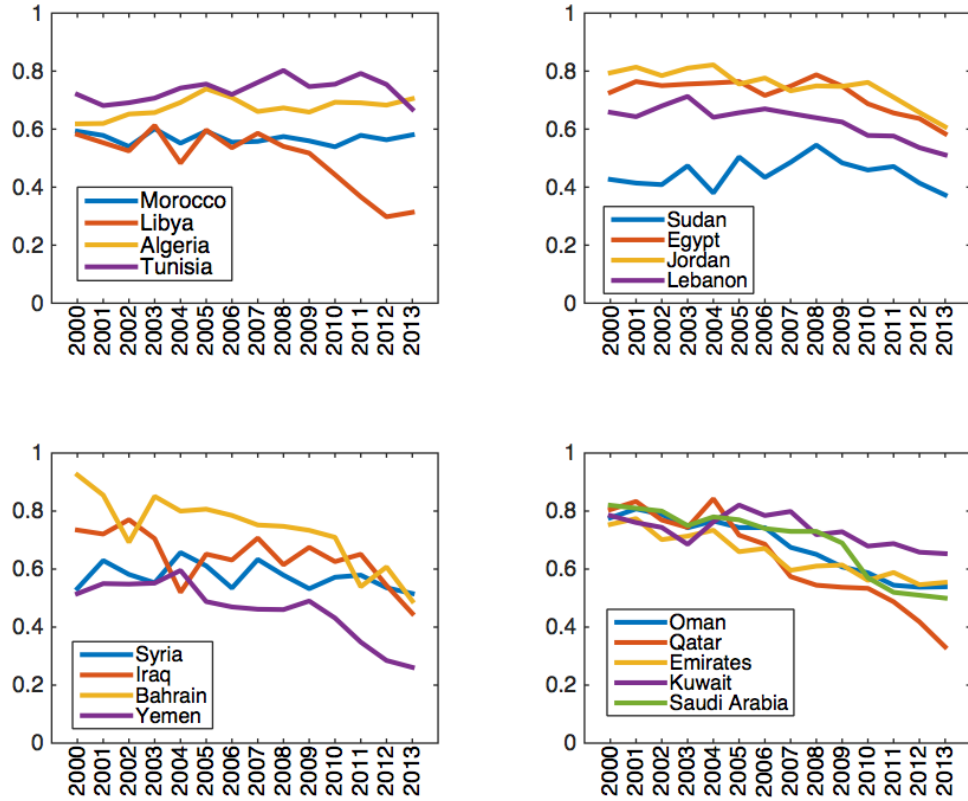

**Fig. B:** Indigeneity (Fraction of domestic corresponding authors in annual publications) for 17 MENA countries.

An analysis of the rate of change of indigeneity per year finds that since 2006, the median decrease in MENA countries was -2.7% as compared to -0.03% in 2000-2005 period (Fig. C and D in this section). This partly explains the rise in productivity in some MENA countries around that time. The increased volume of publications from these countries is partly due to rapid increase in collaboration driven by international researchers. The median annual change for other countries was -0.7% during 2000-2005 period and -0.8% during 2006-2013 (Fig. C and D in this section).

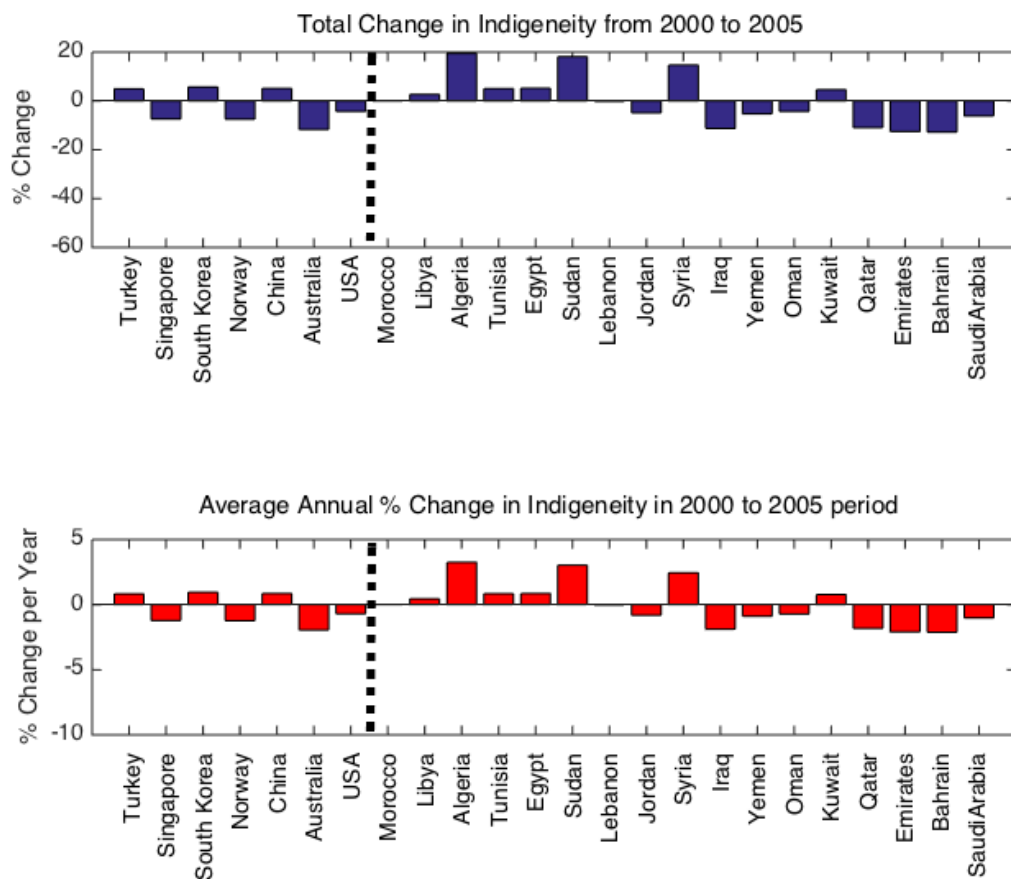

**Fig. C:** Total percentage change (top) and annual percentage change (bottom) in indigeneity during 2000 - 2005. Median change in indigeneity in MENA is -0.03% per year and -0.7% per year in other group during this period.

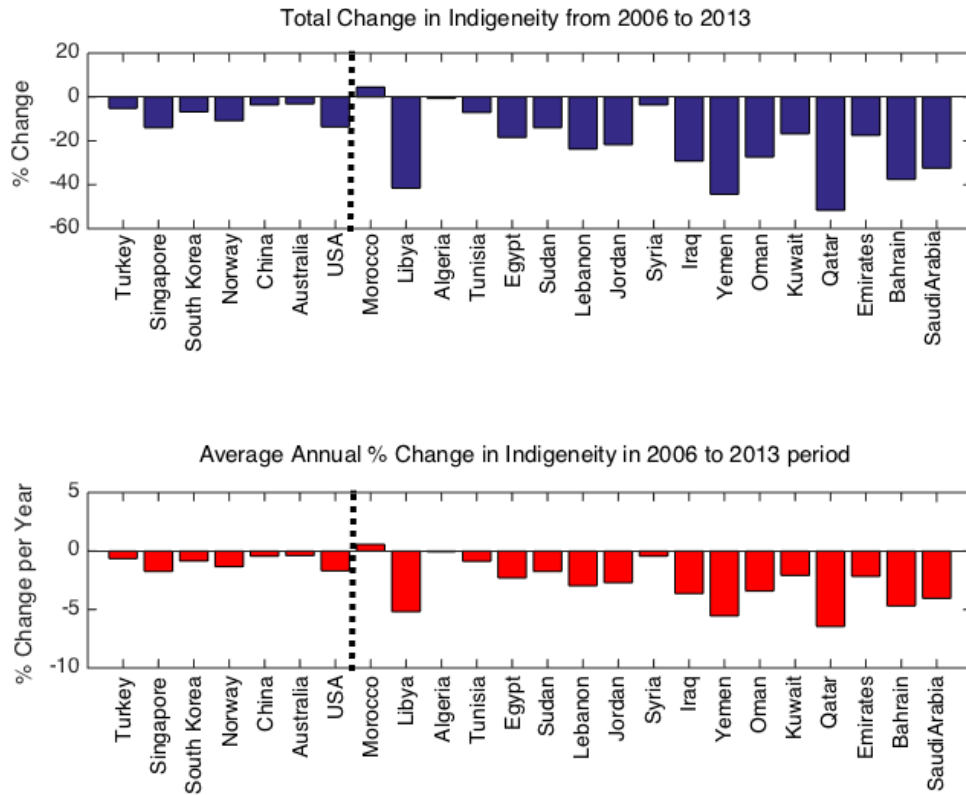

**Fig. D:** Total percentage change (top) and annual percentage change (bottom) in indigeneity during 2006 - 2013. Median change in indigeneity in MENA is -2.7% per year and -0.8% per year in other group during this period.

When the relationship between a country's productivity and indigeneity was analyzed, we found that in most cases there was a negative linear trend, however Saudi Arabia, Qatar, and United Arab Emirates showed almost exponential decline in indigeneity with increasing productivity over time (Fig. E – G in this section). The productivity increases in these countries have occurred in step with decreasing level of indigeneity. In some cases, there were exceptions such as for Turkey, South Korea and China where the negative trend is negligible indicating that productivity gains have been made through expansion of local capacity (wherein fraction of domestic corresponding authors serves as a proxy indicator).

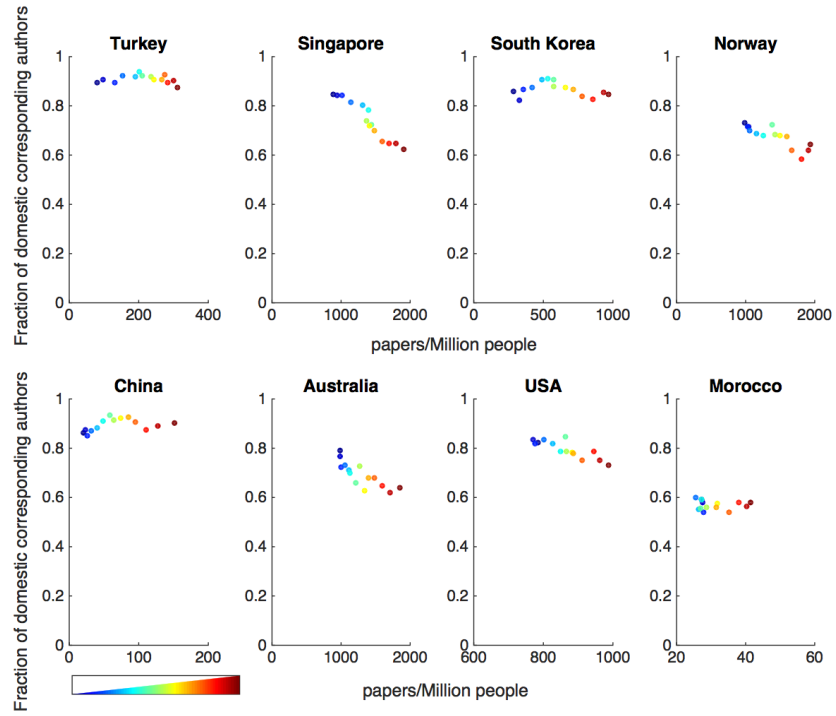

**Fig. E.** Productivity versus Indigeneity of countries.

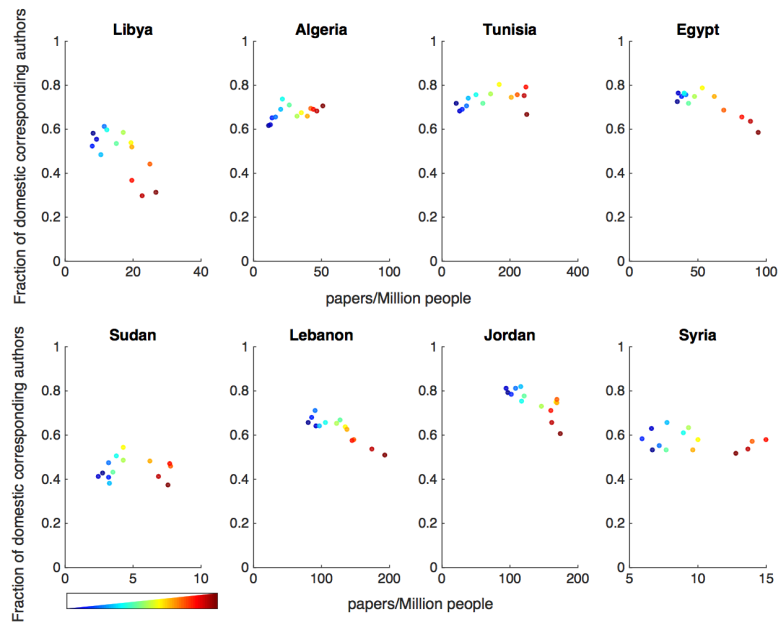

**Fig. F:** Productivity versus Indigeneity of countries

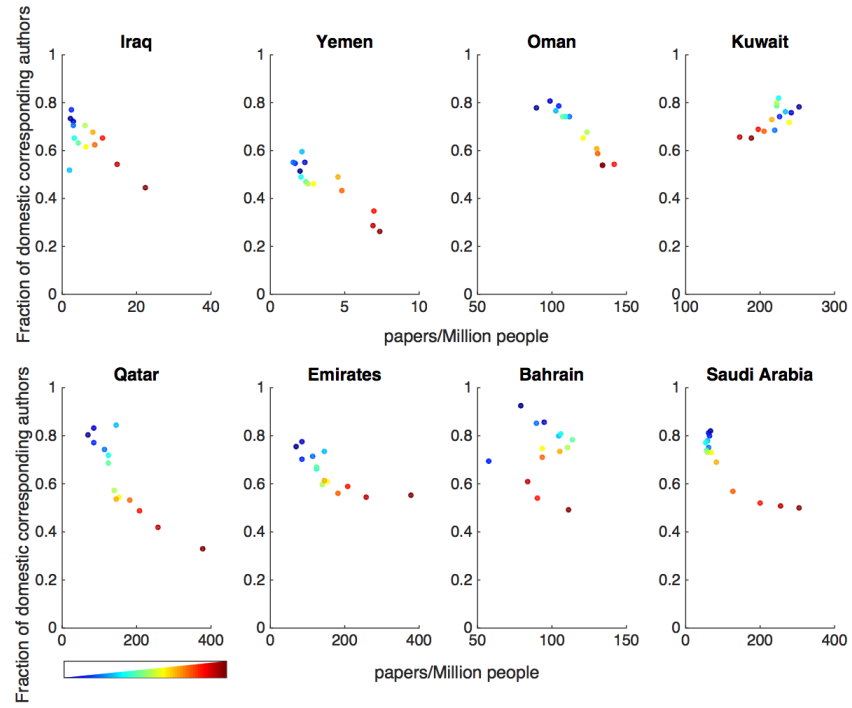

**Fig. G:** Productivity versus Indigeneity of countries



## Section E: Scientific research areas in MENA Countries

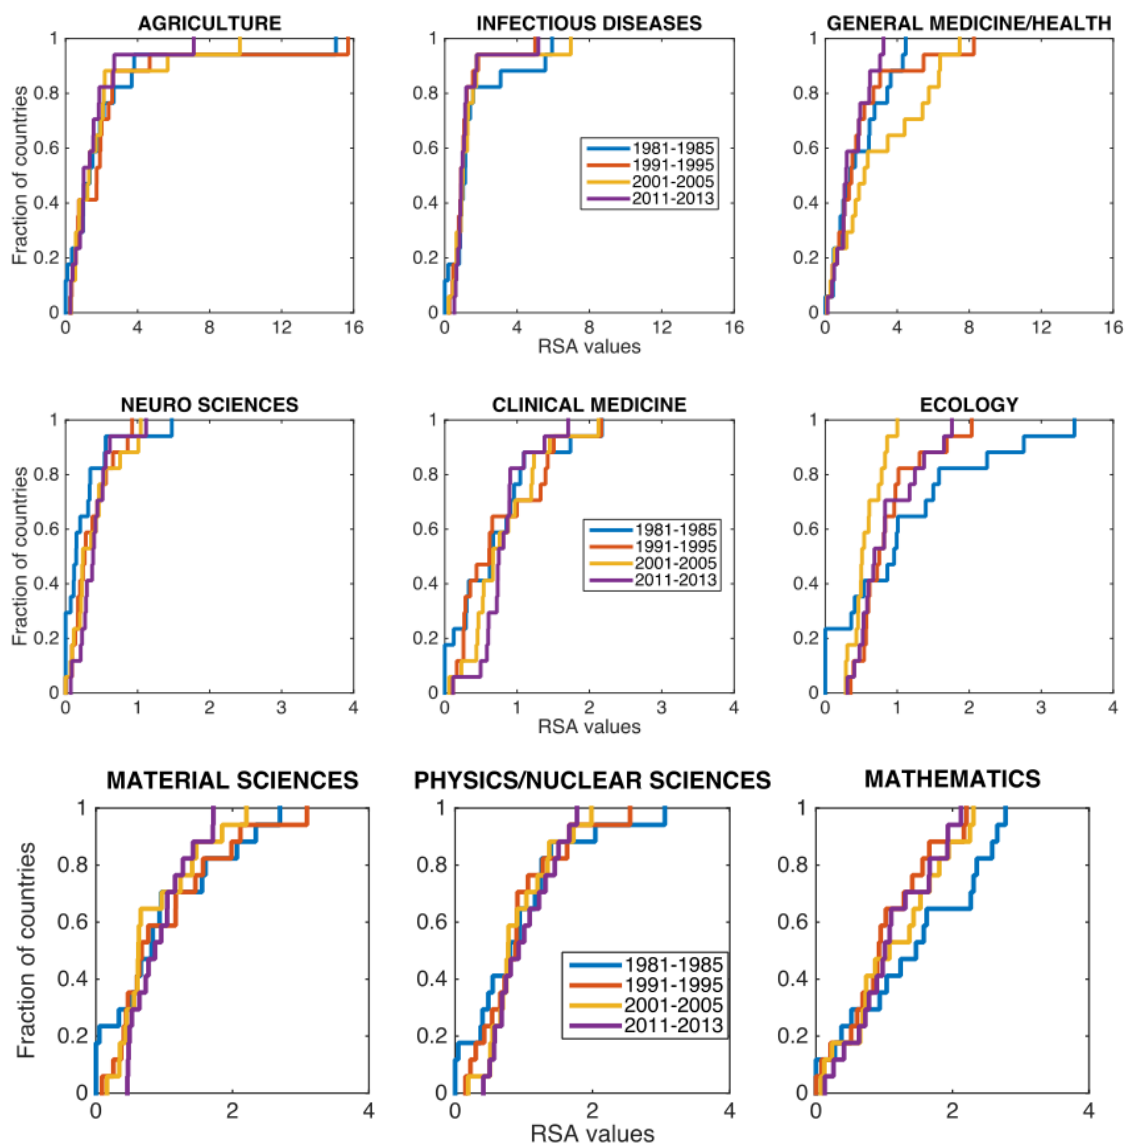

**Fig. A.** Cumulative distribution of Revealed Scientific Advantage for MENA in subjects with increasing focus (top row) and mixed focus (bottom row). X-scale is different in top row.

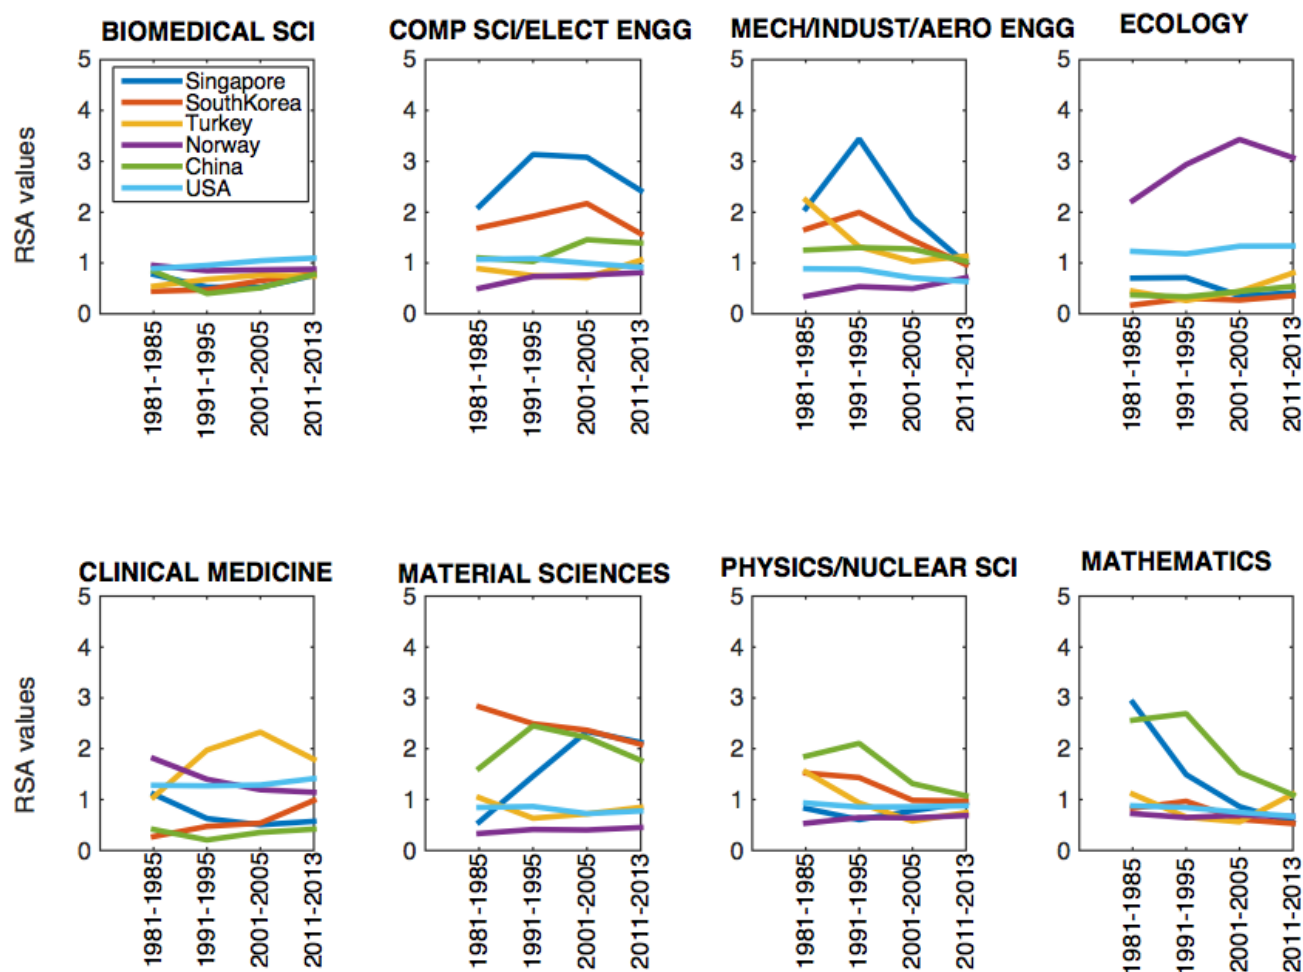

**Fig. B.** RSA for countries in comparison group. Some patterns that stand out include high RSA in computer science/electrical engineering for Singapore, in ecology for Norway, clinical medicine for Turkey, and in materials sciences for South Korea, Singapore, and China.

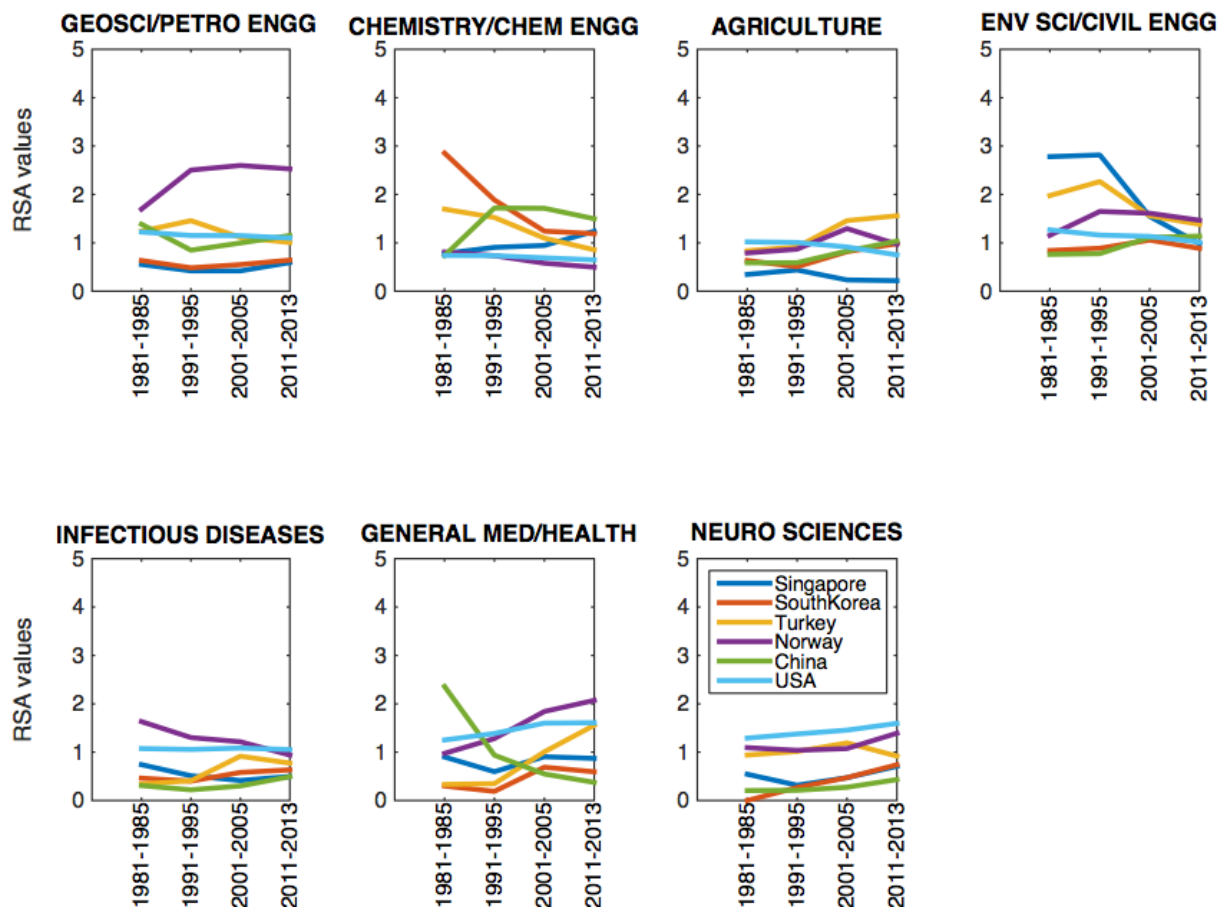

**Fig. C.** Norway shows high RSA in geological sciences/petroleum engineering and general medicine/health, and China in chemical engineering/chemistry. The US shows fairly even emphasis (RSA ~1) across most disciplines, with some higher levels for general medicine/health and neurosciences.

The changing patterns of specialization for the countries in the comparison group can be seen in Fig. B and C in this section. The trends for China show high initial focus (RSA value) in materials sciences, physics, and mathematics – confirming previous findings of sharp focus of specialization during early stages of development (*I*) – followed by falling levels of RSA indicating an evening of emphasis in national research across fields. An initial large focus in mechanical/industrial/aeronautical engineering, mathematics, and civil engineering/environmental sciences is also evident for Singapore.

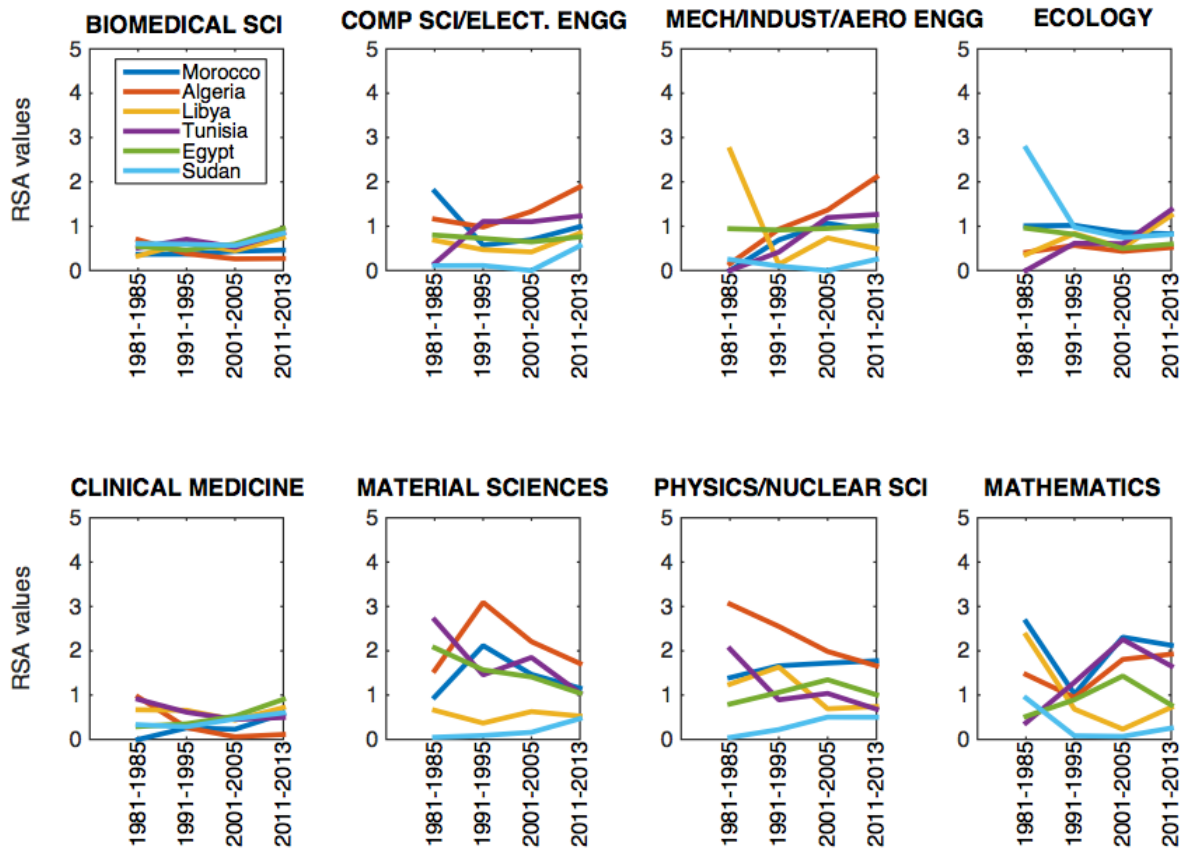

**Figure D:** RSA for countries in North Africa. There is low emphasis in biomedical sciences, clinical medicine, and ecology.

Algeria shows growing focus in computer science and electrical engineering, mechanical/industrial/aeronautical engineering, and somewhat sustained focus in materials science. Algeria, Tunisia, and Morocco show emphasis in mathematics and physics. Tunisia also shows growing focus in Agriculture (Fig. E). Egypt, the largest country in the group shows no particular specialization in any discipline.

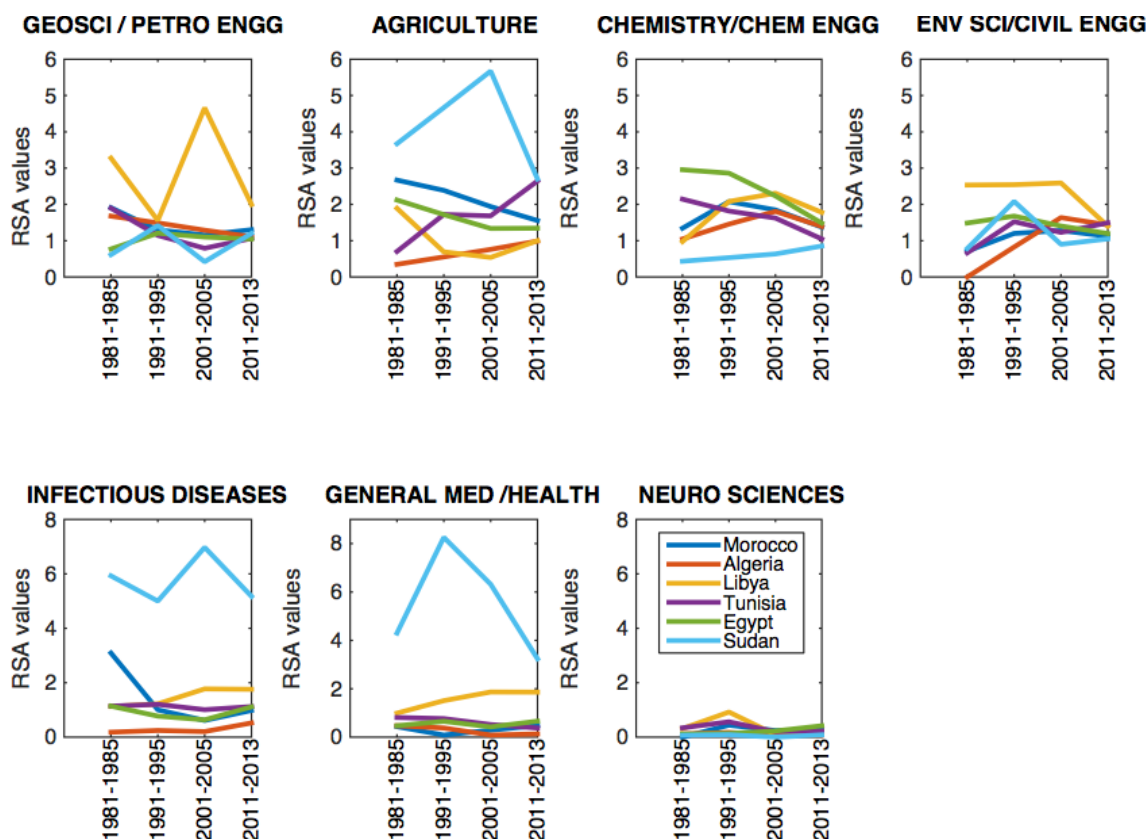

**Figure E:** RSA of North African countries.

Figures D and E collectively show that Egypt, the largest country in the group has no specific specialization, through agriculture, chemistry/chemical engineering, and civil engineering/environmental sciences show somewhat higher RSA values (~1.5). Sudan— a country with small scientific output – focused in agriculture, infectious diseases, and general medicine/health with RSA values up to 6 and 8 in some cases. Libya, another small country in terms of publications, showed strong emphasis (with RSA up to 5) in geological science/petroleum engineering (which also corresponds to the country’s oil resources). It also shows higher RSA values (~2) in chemistry/chemical engineering, environmental science/civil engineering, infectious diseases, and general medicine/health.

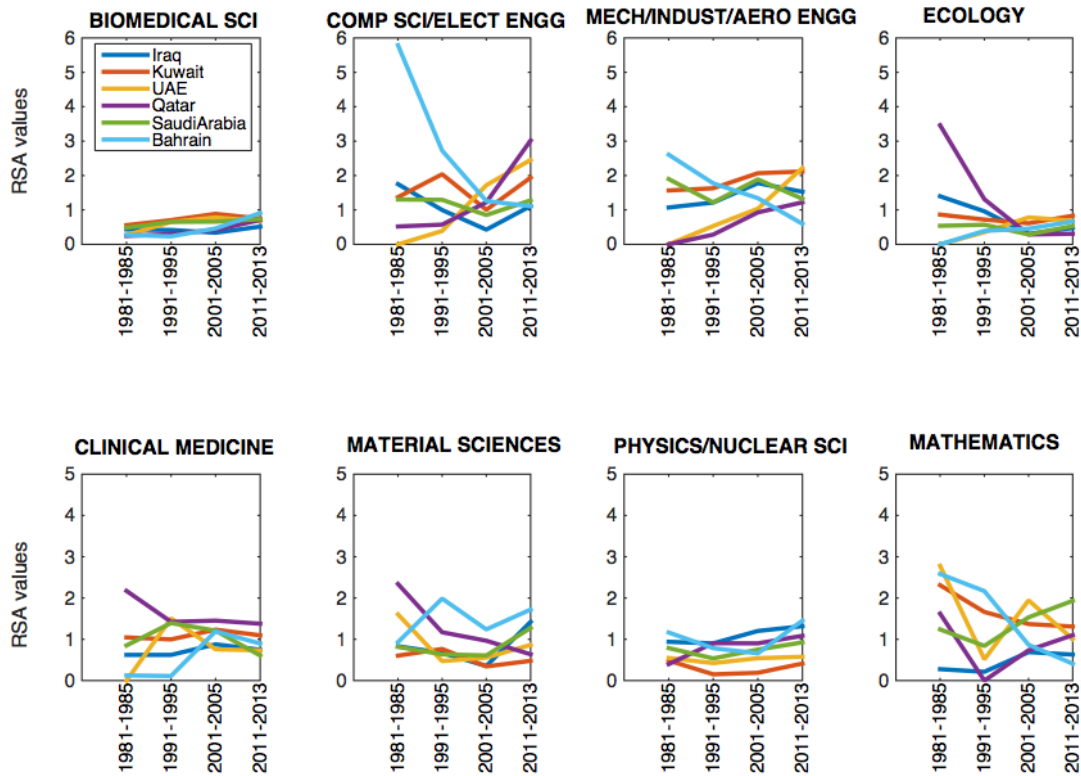

Fig. F: RSA values for Iraq and Gulf countries.

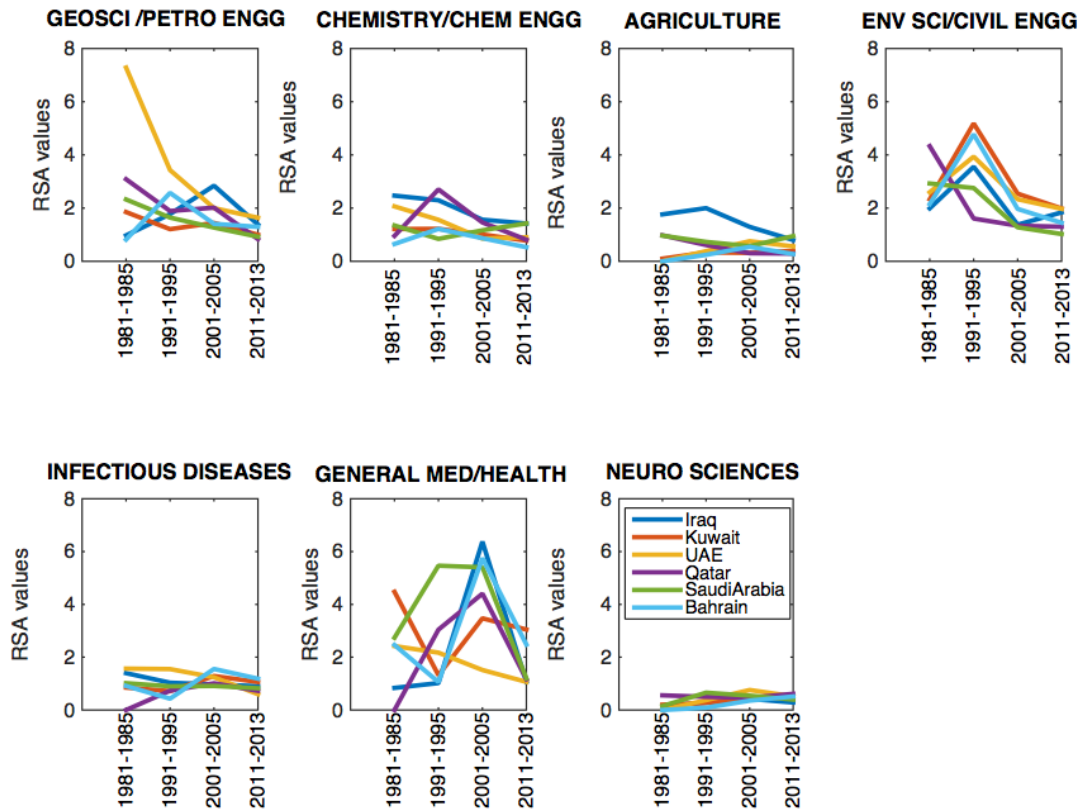

Fig. G: RSA values for Iraq and Gulf countries.

Bahrain, Qatar, and UAE the smaller countries, show some of the highest RSA ( $\sim 4 - 7$ ) in the 1981-1985 period. UAE and Qatar also show consistent rising trends in mechanical/industrial/aeronautical engineering, and in computer science/electrical engineering. Two specific patterns emerging concurrently across most of these countries are interesting: a rise in RSA for civil and environmental engineering in 1991-1995, and an increase in RSA in general medicine and health in 2001-2005 period. The trends in geological science/petroleum engineering and in chemical engineering/chemistry – subjects that relate closely to the largest economic and industrial sectors of oil and gas in these countries – are largely of falling RSA.

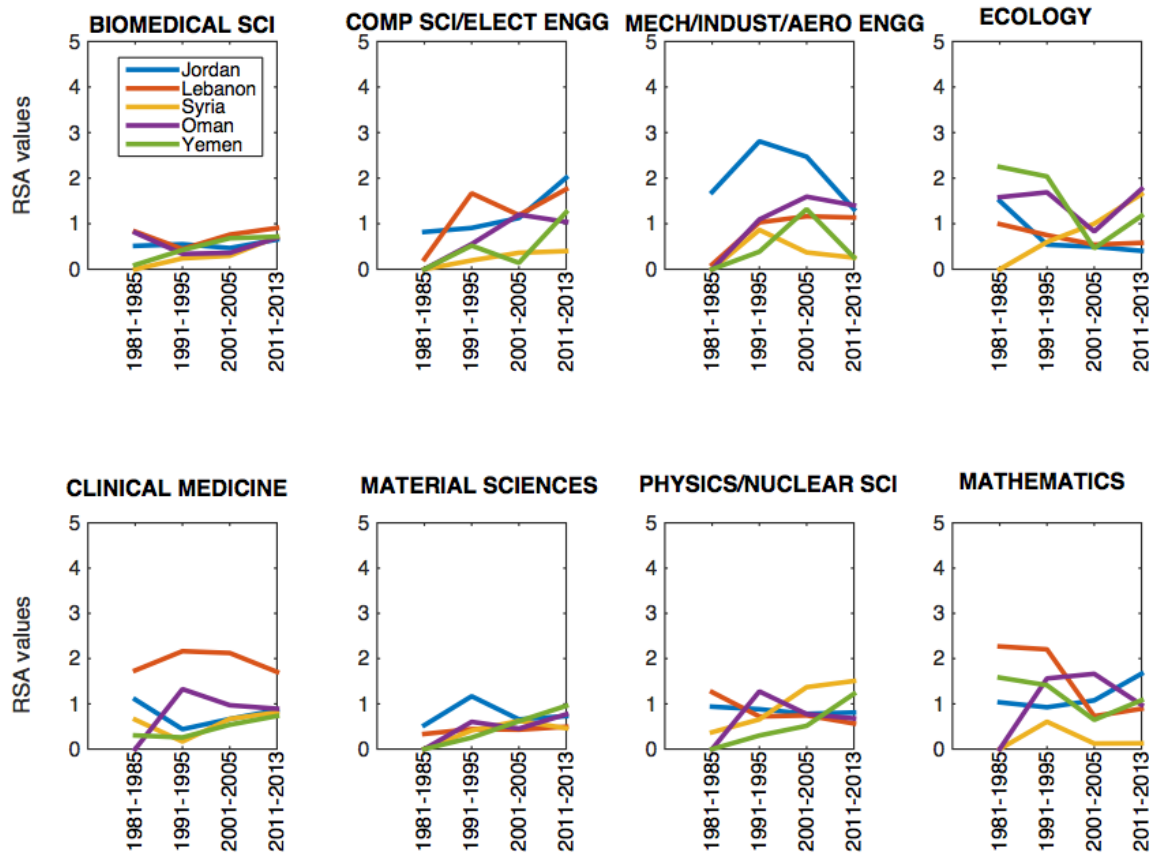

**Fig. H:** RSA for Jordan, Syria, Lebanon, Oman, and Yemen.



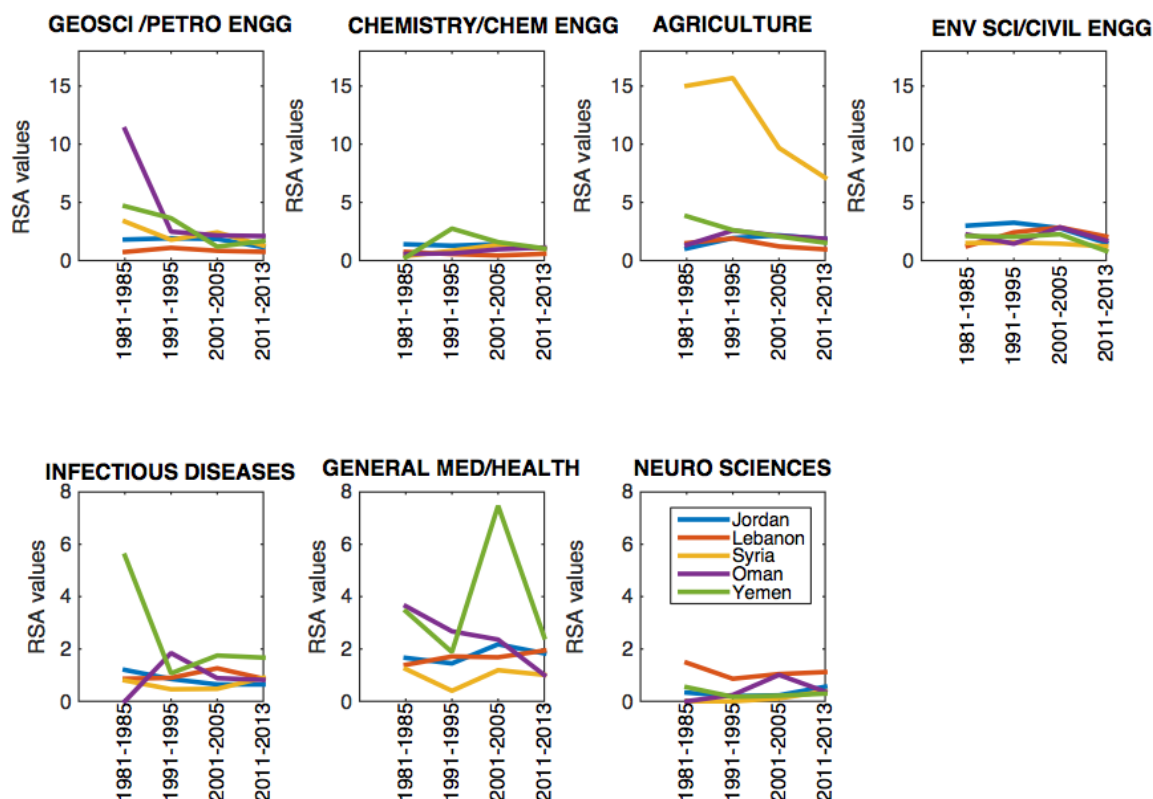

**Fig. I:** RSA for Jordan, Syria, Lebanon, Oman, and Yemen.

In this group of countries, the rising trends follow similar patterns to those observed for Gulf countries, with mostly growing emphasis in computer science/electrical engineering, and more modestly (but consistently) in biomedical sciences.

## References and Notes:

1. R. M. May, The Scientific Wealth of Nations, *Science*, **275**, (5301), 793-796 (1997).
2. C. Freeman, *Technology Policy and Economic Performance: Lessons from Japan* (Pinter, London, 1987).
3. R. Solow, Technical Change and the Aggregate Production Function, *Review of Economics and Statistics*, **39**, 312–20 (1957)
4. J. A. Schumpeter, *The Theory of Economic Development* (Oxford University Press, 1934).
5. J. Adams, K. Christopher, P. Pendlebury, D. Hook, J. Wilson, “Exploring the changing landscape of Arabian, Persian, and Turkish research”, (Global Research Report, Thompson Reuters, 2011).
6. A. Zewail, Dire need for a Middle Eastern science spring, *Nature Materials*, **13**, 38-320 (2014)
7. D. King, The Scientific Impact of Nations: What different countries get for their research spending, *Nature*, **430**, 311-316 (2004)
8. D. Hicks, P. Wouters, L. Waltman, S. de Rijcke, I. Rafols, Bibliometrics: The Leiden Manifesto for research metrics, *Nature*, **520**, 429-431 (2015).



9. R. C. Coile, Lotka's Frequency Distribution of Scientific Productivity, *Journal of the American Society for Information Science*, **28**(6), 366-370 (1977).
10. D. Hicks, J. Melkers in *Handbook on the Theory and Practice of Program Evaluation*. Eds. Al Link & Nick Vornatas. Edward Elgar (2012).
11. A. B. Jaffe, M. Trajtenberg, R. Henderson, Geographic localization of knowledge spillovers as evidenced by patent citations. *Quarterly Journal of Economics* **108**, 577–598 (1993).
12. C. Freeman, The 'National System of Innovation' in a historical perspective, *Cambridge Journal of Economics*, **19**, 5-24 (1995).
13. O. Sorenson, J. W. Rivkin, L. Fleming, Complexity, networks and knowledge flow. *Research Policy* **35**, 994–1017 (2006).
14. M. McKelvey, H. Alm, M. Riccaboni, Does co-location matter for formal knowledge collaboration in the Swedish biotechnology-pharmaceutical sector?, *Research Policy*, **32**, 483-501 (2003).
15. S. Wuchty, B. F. Jones, B. Uzzi, The Increasing Dominance of Teams in Production of Knowledge, *Science*, **316**, 1036-1039 (2007).
16. B. F. Jones, S. Wuchty, B. Uzzi, Multi-University Research Teams: Shifting Impact, Geography, and Stratification in Science, *Science*, **322**, 1259-1262 (2008).
17. J. Adams, The fourth age of research, *Nature*, **497**, 557-560 (2013).
18. J. P. Walsh, N. G. Maloney, Collaboration Structure, Communication Media, and Problems in Scientific Work Teams, *Journal of Computer-Mediated Communication*, **12**, 712-732 (2007).
19. B. Uzzi, J. Spiro, Collaboration and Creativity: The Small World Problem, *American Journal of Sociology*, **111** (2), 447-504 (2005)
20. "National Science Board Science and Engineering Indicators 2014", (NSB 14-01) National Science Foundation (2014).
21. L. Leydesdorff, I. Rafols, A Global Map of Science Based on the ISI Subject Categories, *Journal of the American Society for Information Science and Technology*, **60** (2) 348-362 (2009).
22. Hajjar D P, Moran G W, Siddiqi A, Richardson J E, Anadon L D, Narayanamurti V "Prospects for Policy Advances in Science and Technology in the Gulf Arab States: The Role for International Partnerships", *International Journal on Higher Education*, **3** (3), 45-57 (2014).
23. *Cochrane Handbook for Systematic Reviews of Interventions*, Version 5.1.0, Eds. J. Higgins, S. Green, (2011).
24. World DataBank, <http://databank.worldbank.org/data/home.aspx>.
25. [http://images.webofknowledge.com/WOK46/help/WOS/h\\_advanced\\_fieldtags.html](http://images.webofknowledge.com/WOK46/help/WOS/h_advanced_fieldtags.html)
26. C. A. Hidalgo, B. Klinger, A. L. Barabasi, R. Hausmann, The Product Space Conditions the Development of Nations, *Science*, 317, 482-487 (2007).
27. "Educating the Next Generation of Emiratis: A Master Plan for UAE Higher Education", United Arab Emirates Ministry of Higher Education and Scientific Research, Office of Higher Education Policy and Planning, (2007).
28. "Qatar National Development Strategy 2011~ 2016: Towards Qatar National Vision 2030", Qatar General Secretariat for Development Planning, Doha (2011).

29. M. Grueber, M., T. Studt, T., 2012 Global R&D Funding Forecast: R &D spending growth continues while globalization accelerates, *R & D Magazine*, December 16, (2011).
30. <http://www.jadwa.com/en/download/2014-budget/saudi-arabias-2014-budget>
31. “Kuwait University - Annual Report 2008-2009”, Office of the Vice President for Research. Kuwait (2009).
32. Q. Schiermeier, Middle Eastern Promise, *Nature*, **500**, 111-112 (2013).
33. World Development Indicators: Population Dynamics, <http://wdi.worldbank.org/table/2.1#>
34. OCED Science, Technology and Industry Outlook (2012). <http://www.oecd.org/sti/sti-outlook-2012-egypt.pdf>
35. Y. Bhattacharjee, Saudi Universities Offer Cash in Exchange for Academic Prestige, *Science*, **334**, 1344-1345 (2011)
